# Supplementary material
Source: PubMed Central journal article supplement (PMC5576567)
Supplement: NIHMS891606-supplement-1.pdf [file NIHMS891606-supplement-1.pdf]

## **Control of Treg differentiation by the transcription factors Thpok and LRF.**

### **Supplementary data**

Andrea C. Carpenter, Elizabeth Wohlfert, Laura Chopp, Melanie S. Vacchio, Jia Nie, Yongmei Zhao, Jyoti Shetty, Qi Xiao, Callie Deng, Bao Tran, Margaret Cam, Matthias M. Gaida, Yasmine Belkaid and Rémy Bosselut.

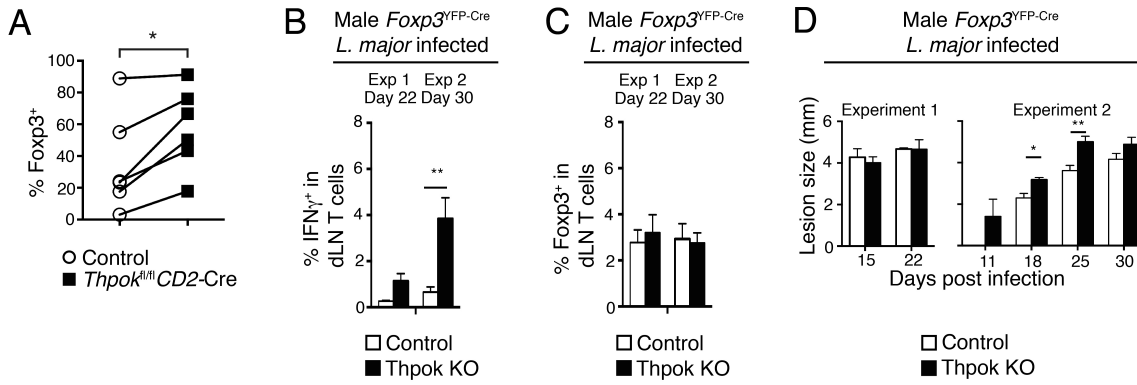

**Figure S1. Thpok is dispensable for TGF $\beta$  induced Foxp3 expression and Treg response to *L. major*.**

(A) Percentage of Foxp3<sup>+</sup> T cells among cells of the indicated genotypes after anti-CD3 activation and 4-day culture in the presence of IL-2 and TGF $\beta$ . Starting cell populations were sorted as CD4<sup>+</sup>CD8<sup>-</sup>CD44<sup>lo</sup>. Each symbol represents a distinct mouse; data is from 5 distinct experiments (\*:  $P < 0.05$ , paired t-test).

(B, C) Percentage of IFN $\gamma$ <sup>+</sup> (B) or Foxp3<sup>+</sup> (C) among TCR $\beta$ <sup>+</sup> cells in draining lymph nodes (dLN) in control (open bars) or Thpok KO (closed bars) male mice infected with *L. major* (\*\*:  $P < 0.01$ ).

(D) Time-course of progression of ear lesion size in mice analyzed in (B, C). Data (B-D) is from two independent experiments (shown on top of bar graphs in [A, B]), with at least five mice each group and analyzed either 22 or 30 days post-inoculation (\*:  $P < 0.05$ ; \*\*:  $P < 0.01$ ).

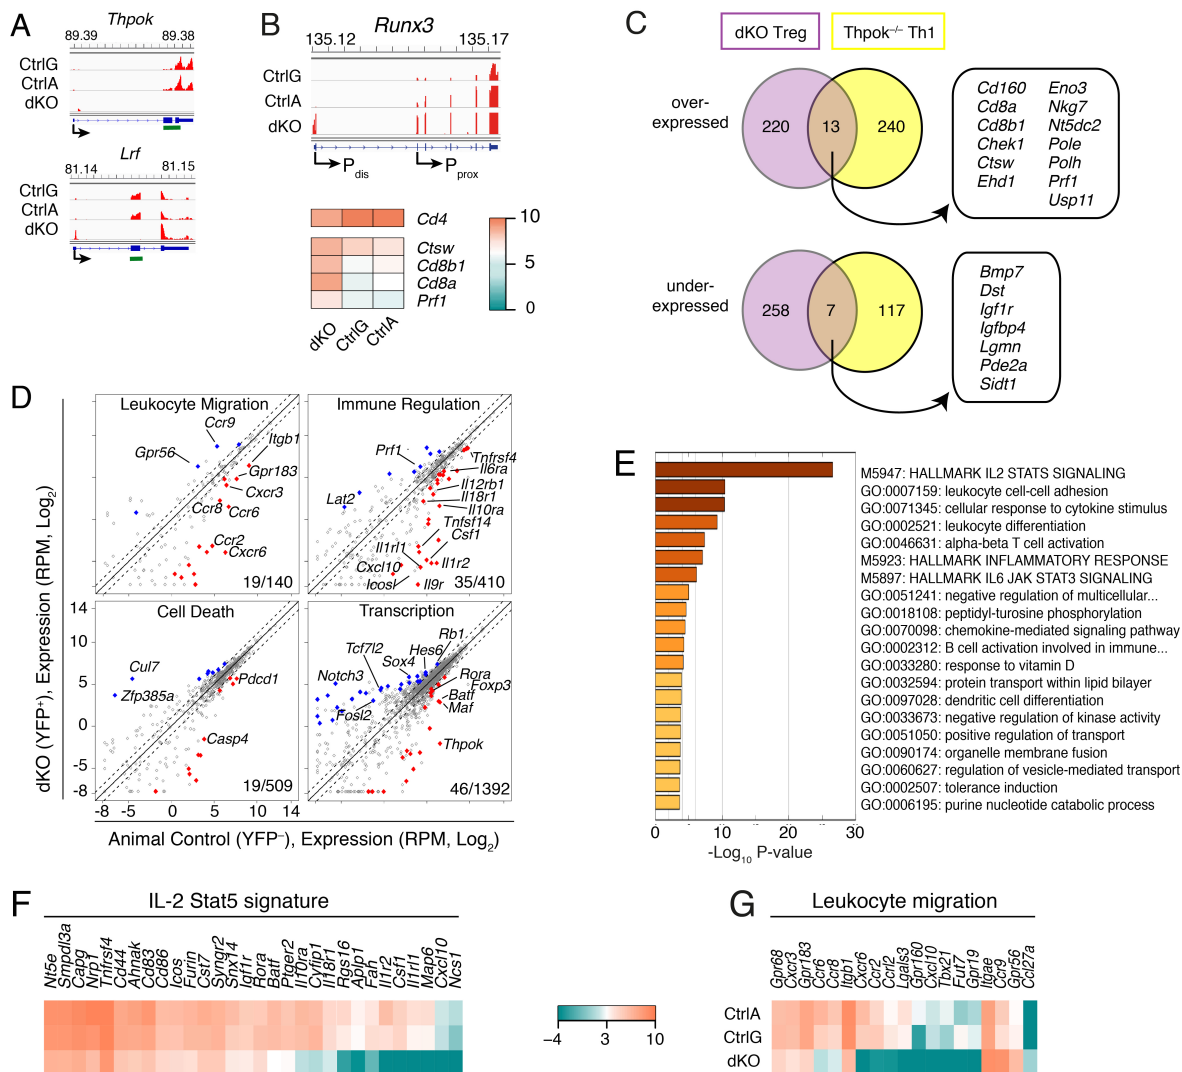

**Figure S2. Transcriptome analyses of dKO Treg cells.**

(A) Integrative Genomics Viewer (IGV) tracks show the distribution of RNAseq reads from dKO, genetic (CtrlG) and animal (CtrlA) control cells at *Thpok* and *Lrf* loci. Chromosomal coordinates are indicated at the top and genes schematically depicted at the bottom of each panel; thick and thin blue boxes depict coding and non-coding exonic sequences, respectively. Thick green bars underneath gene depiction indicate floxed segments in *Thpok<sup>fl</sup>* and *Lrf<sup>fl</sup>* alleles.

(B) (Top) IGV tracks, as in (A), show read distribution at the *Runx3* locus.  $P_{dis}$  and  $P_{prox}$  refer to the *Runx3* distal and proximal promoters, of which the only former gives rise to translated transcripts in T cells. (Bottom) Heat map shows expression of indicated genes in dKO, CtrlG and CtrlA cells (Log<sub>2</sub> values, color scale at right).

(C) (left) Venn diagram showing the overlap between the set of genes over-expressed (top) or under-expressed (bottom) in dKO relative to control Treg cells (purple, defined in Fig. 6A) or in *Thpok<sup>-/-</sup>* relative to control conventional Th1 effectors (17) (yellow). Boxes to the right list genes common to each pair of sets.

(D) Scatter plots show expression of genes from indicated Gene Ontology (GO) category (average of three samples, Log<sub>2</sub> RPM values) in animal control (CtrlA) vs. dKO Treg cells. Genes significantly ( $P < 0.05$ ) over-expressed or under-expressed in dKO cells relative to both animal and genetic controls are shown in blue or red, respectively. Dashed lines indicate 2-fold change. Relevant genes are indicated. Ratios in bottom right corner of each plot indicate the number of genes with significantly changed expression over the total number of expressed genes in each GO category.

(E) Graphical display from Metascape (metascape.org) analysis listing gene signatures with significant enrichment in the set of genes under-expressed in dKO relative to control cells. Scale at the bottom indicates P-value (-Log<sub>10</sub>).

(F, G) Heat map shows the expression in dKO, CtrlG and CtrlA cells of genes from Metascape IL-2 Stat5 (F), or GO leukocyte migration (G) signatures and under-expressed in dKO Treg cells [Log<sub>2</sub> values, orange-green color scale between (F) and (G)].

Table S1: Over-expressed genes <sup>1</sup>

| Gene       | Sample |        |        |        |        |        |       |       |       | Fold Change (Log2) |               | P-Value       |               |
|------------|--------|--------|--------|--------|--------|--------|-------|-------|-------|--------------------|---------------|---------------|---------------|
|            | CtrlA1 | CtrlA2 | CtrlA3 | CtrlG1 | CtrlG2 | CtrlG3 | dKO1  | dKO2  | dKO3  | dKO vs. CtrlA      | dKO vs. CtrlG | dKO vs. CtrlA | dKO vs. CtrlG |
| Epb4.1l5   | -7.77  | -4.98  | -7.77  | -6.58  | -3.58  | -5.56  | 5.29  | 5.67  | 4.62  | 12.04              | 10.43         | 2.96E-05      | 6.82E-05      |
| Nt5dc2     | -6.99  | -7.77  | -6.99  | -6.58  | -7.77  | 2.25   | 4.16  | 4.28  | 5.25  | 11.81              | 8.62          | 2.95E-04      | 1.54E-03      |
| Cpxm1      | -7.77  | -7.77  | -6.99  | -7.24  | -7.77  | -7.77  | 4.57  | 4.06  | 3.85  | 11.66              | 11.75         | 6.80E-06      | 6.37E-06      |
| Tuft1      | -5.54  | -7.77  | -7.77  | -6.58  | 2.68   | -5.56  | 4.18  | 3.72  | 4.58  | 11.18              | 7.27          | 3.19E-04      | 2.77E-03      |
| Bai2       | -7.77  | -7.77  | -6.99  | -6.58  | -7.77  | -7.77  | 2.99  | 3.19  | 4.30  | 11.01              | 10.87         | 2.26E-05      | 2.51E-05      |
| Rcor2      | -7.77  | -7.77  | -7.77  | -7.77  | -0.60  | -4.15  | 3.47  | 2.44  | 3.74  | 10.98              | 7.37          | 1.09E-04      | 1.25E-03      |
| Notch3     | -6.99  | -2.23  | -7.77  | -5.71  | -4.81  | -6.81  | 5.81  | 6.04  | 3.47  | 10.76              | 10.88         | 2.78E-03      | 2.64E-03      |
| Vangl2     | -2.27  | -4.98  | -6.99  | -1.97  | 3.45   | -4.64  | 5.57  | 6.19  | 5.96  | 10.66              | 6.92          | 2.87E-04      | 1.67E-03      |
| Gm11998    | -7.77  | -7.77  | -7.77  | -1.36  | -5.73  | -0.76  | 3.08  | 2.58  | 2.00  | 10.32              | 5.18          | 9.89E-05      | 5.25E-03      |
| Zfp385a    | -7.77  | -4.98  | -6.99  | -7.24  | -7.77  | -7.77  | 3.61  | 3.20  | 4.24  | 10.25              | 11.27         | 3.56E-05      | 1.61E-05      |
| Mcam       | -6.99  | -3.38  | -6.99  | -6.81  | -5.73  | -7.77  | 3.58  | 4.02  | 5.75  | 10.23              | 11.23         | 4.95E-04      | 2.97E-04      |
| Cul7       | -5.33  | -1.98  | -6.34  | 4.03   | 4.28   | 1.57   | 5.92  | 5.90  | 5.12  | 10.18              | 2.30          | 3.96E-04      | 7.72E-03      |
| Arhgef25   | -6.99  | -7.77  | -7.77  | -7.77  | -5.73  | -7.77  | 2.93  | 2.29  | 1.85  | 9.86               | 9.44          | 5.03E-05      | 7.23E-05      |
| Tubb3      | -3.96  | -7.77  | -6.99  | -7.24  | -7.77  | -7.77  | 3.61  | 2.94  | 3.87  | 9.71               | 11.06         | 6.18E-05      | 2.27E-05      |
| Bag2       | -5.73  | -4.98  | -7.77  | -7.77  | -5.73  | -7.77  | 3.44  | 3.97  | 3.06  | 9.65               | 10.59         | 5.58E-05      | 2.88E-05      |
| 2700081015 | 0.64   | -7.77  | -7.77  | -6.81  | -4.81  | -7.77  | 5.09  | 4.68  | 4.08  | 9.60               | 11.07         | 5.24E-04      | 2.51E-04      |
| Maml3      | -1.00  | -7.77  | -6.99  | -6.58  | -5.73  | -6.81  | 4.45  | 3.67  | 4.88  | 9.59               | 10.69         | 2.62E-04      | 1.44E-04      |
| Chrm4      | -7.77  | -4.98  | -7.77  | -6.81  | -7.77  | -7.77  | 3.54  | 1.35  | 2.82  | 9.38               | 10.00         | 1.86E-04      | 1.12E-04      |
| Tsga10     | -7.77  | -7.77  | -7.77  | 0.31   | -7.77  | -7.77  | 1.24  | 3.28  | 0.13  | 9.34               | 6.65          | 1.70E-03      | 1.05E-02      |
| Chek1      | -7.77  | -4.98  | -7.77  | -6.58  | 1.32   | -0.39  | 0.79  | 2.82  | 3.40  | 9.20               | 4.23          | 1.89E-03      | 4.81E-02      |
| Grin2d     | -7.77  | -7.77  | -6.34  | -7.24  | -4.81  | -7.77  | -0.54 | 3.57  | 2.41  | 9.15               | 8.46          | 8.03E-04      | 1.37E-03      |
| Kirrel     | -7.77  | -7.77  | -7.77  | -7.77  | -7.77  | -7.77  | 0.91  | -0.22 | 3.42  | 9.14               | 9.14          | 3.98E-04      | 3.98E-04      |
| Olf755-ps1 | -7.77  | -7.77  | -7.77  | -7.77  | -7.77  | -7.77  | 0.89  | 1.14  | 1.74  | 9.03               | 9.03          | 1.06E-04      | 1.06E-04      |
| Trnp1      | -7.77  | -7.77  | -7.77  | -7.24  | -7.77  | -7.77  | 2.25  | -0.56 | 1.97  | 8.97               | 8.80          | 3.06E-04      | 3.56E-04      |
| Dchs1      | -7.77  | -7.77  | -7.77  | -7.24  | -7.77  | -6.81  | 3.02  | -4.01 | 4.33  | 8.84               | 8.34          | 9.38E-03      | 1.28E-02      |
| Pln        | -7.77  | -4.98  | -6.34  | -6.81  | 2.01   | -5.56  | 1.89  | 2.75  | 2.71  | 8.82               | 5.89          | 1.64E-03      | 1.10E-02      |
| 4930513N10 | -7.77  | -7.77  | -2.35  | -7.77  | -5.73  | -0.65  | 3.88  | 2.98  | 1.56  | 8.76               | 7.52          | 1.73E-03      | 3.65E-03      |
| Sema4c     | -6.99  | -7.77  | -7.77  | -7.77  | -4.81  | -6.81  | 4.08  | -1.32 | 0.99  | 8.72               | 7.67          | 1.88E-03      | 4.13E-03      |
| Efcab5     | -7.77  | -7.77  | -6.99  | -7.77  | -7.77  | -2.35  | 1.30  | -0.22 | 2.57  | 8.72               | 7.18          | 9.34E-04      | 3.09E-03      |
| Arhgap33   | -7.77  | -7.77  | -7.77  | -7.77  | -7.77  | -5.56  | 3.17  | -4.01 | 3.58  | 8.64               | 7.90          | 8.45E-03      | 1.36E-02      |
| Ppic       | -6.99  | -4.98  | -7.77  | 0.04   | 0.27   | -5.56  | 1.00  | 2.85  | 2.04  | 8.56               | 3.72          | 1.25E-03      | 4.79E-02      |
| Slc6a19    | -6.99  | -7.77  | -7.77  | -7.77  | -5.73  | -5.56  | 5.09  | -3.41 | 1.60  | 8.55               | 7.39          | 9.57E-03      | 1.93E-02      |
| Gm16225    | -7.77  | -7.77  | -7.77  | -7.77  | -7.77  | -7.77  | 0.42  | 1.02  | 0.78  | 8.51               | 8.51          | 1.92E-04      | 1.92E-04      |
| 6030442K20 | -7.77  | -4.98  | -7.77  | 1.18   | -7.77  | -7.77  | 0.24  | 3.45  | 1.12  | 8.47               | 6.43          | 5.03E-03      | 1.73E-02      |
| Nim1k      | -7.77  | -4.98  | -6.34  | -7.24  | -5.73  | -7.77  | 2.50  | 3.11  | 0.55  | 8.42               | 8.97          | 5.22E-04      | 3.42E-04      |
| Hcn3       | -7.77  | -2.67  | -7.77  | 1.74   | -5.73  | -6.81  | 3.21  | 1.87  | 1.97  | 8.40               | 5.95          | 3.20E-03      | 1.48E-02      |
| Ptprf      | -5.54  | -2.23  | -6.99  | 3.09   | -7.77  | -6.81  | 3.39  | 2.46  | 4.36  | 8.30               | 7.24          | 5.38E-03      | 9.34E-03      |
| RP23-463E8 | -2.58  | -4.98  | -6.99  | 1.29   | -3.40  | -3.73  | 3.08  | 3.53  | 3.41  | 8.20               | 5.30          | 5.39E-04      | 4.57E-03      |
| Maneal     | -7.77  | -7.77  | -7.77  | -7.77  | -7.77  | -5.56  | 3.28  | -5.27 | 3.23  | 8.14               | 7.40          | 1.62E-02      | 2.54E-02      |
| BC035044   | -6.99  | 2.77   | -6.99  | 0.04   | -5.73  | -7.77  | 5.70  | 3.02  | 4.67  | 8.12               | 8.91          | 1.30E-02      | 9.20E-03      |
| Dscc1      | -5.54  | -4.98  | -7.77  | 1.18   | -4.81  | -5.56  | 2.22  | 1.74  | 1.98  | 8.07               | 5.04          | 1.50E-03      | 1.42E-02      |
| Pianp      | -7.77  | -7.77  | 1.61   | -5.71  | -7.77  | -7.77  | 2.46  | 4.20  | 3.46  | 8.05               | 10.49         | 3.00E-03      | 7.52E-04      |
| AA413626   | -7.77  | -7.77  | -7.77  | -7.77  | -7.77  | 1.02   | -0.37 | -0.44 | 1.42  | 7.98               | 5.06          | 5.94E-03      | 4.46E-02      |
| Crocc      | -5.33  | -4.98  | -4.88  | -2.88  | -7.77  | -6.81  | 1.01  | 3.83  | 3.68  | 7.94               | 8.71          | 1.55E-03      | 9.50E-04      |
| Aebp1      | -7.77  | -7.77  | -6.99  | -6.81  | -7.77  | -7.77  | -3.13 | 4.06  | 0.21  | 7.93               | 7.87          | 5.99E-03      | 6.26E-03      |
| Gm12247    | -7.77  | -4.98  | -7.77  | -7.77  | -7.77  | -5.56  | 0.49  | 1.71  | 1.04  | 7.93               | 8.12          | 6.04E-04      | 5.06E-04      |
| Ptprn      | -7.77  | -4.98  | -6.99  | 0.82   | -7.77  | -7.77  | -2.51 | 3.23  | 3.15  | 7.91               | 6.26          | 1.67E-02      | 3.98E-02      |
| Gm15743    | -7.77  | -7.77  | -7.77  | -6.81  | -7.77  | -4.81  | -0.54 | 1.05  | -0.17 | 7.89               | 6.59          | 7.07E-04      | 2.38E-03      |
| Efemp2     | -7.77  | 1.40   | -6.99  | -7.24  | -0.06  | 1.70   | 3.82  | 2.33  | 4.26  | 7.87               | 5.31          | 1.02E-02      | 3.85E-02      |
| 2810408A11 | -3.40  | -7.77  | -7.77  | -7.77  | 2.79   | -7.77  | 0.74  | 1.22  | 2.60  | 7.85               | 5.75          | 1.13E-02      | 3.78E-02      |
| 2010320M18 | -7.77  | -7.77  | -5.56  | 0.18   | -7.77  | -7.77  | 0.53  | -0.37 | 2.26  | 7.84               | 5.94          | 5.15E-03      | 1.89E-02      |
| Gm11738    | -7.77  | -7.77  | -6.99  | -7.24  | -5.73  | -7.77  | 2.60  | 3.64  | -5.27 | 7.84               | 7.24          | 1.80E-02      | 2.60E-02      |
| Xpnpep2    | -7.77  | -7.77  | -7.77  | -7.77  | -7.77  | -7.77  | -0.95 | 1.24  | -0.41 | 7.74               | 7.74          | 7.45E-04      | 7.45E-04      |
| Egfl7      | -1.45  | -7.77  | -7.77  | -7.77  | -7.77  | -7.77  | 1.94  | 1.96  | 2.23  | 7.73               | 9.82          | 1.11E-03      | 2.26E-04      |
| Celsr2     | -6.99  | -7.77  | -1.67  | -5.44  | -3.40  | -3.73  | 3.21  | 0.81  | 2.76  | 7.72               | 6.42          | 1.87E-03      | 4.68E-03      |
| Kcna2      | -5.33  | -2.67  | -5.56  | 2.32   | -4.81  | -7.77  | 3.17  | 3.62  | 2.54  | 7.63               | 6.54          | 3.66E-03      | 7.15E-03      |
| Gm28557    | -5.33  | -4.98  | -7.77  | -1.60  | -7.77  | -5.56  | 1.68  | 0.58  | 2.51  | 7.61               | 6.57          | 1.92E-03      | 4.12E-03      |
| Pla2g7     | -7.77  | -7.77  | -7.77  | -7.77  | -7.77  | -7.77  | 1.71  | -3.41 | 1.00  | 7.51               | 7.51          | 3.56E-03      | 3.56E-03      |
| Gm5148     | -7.77  | -7.77  | -7.77  | -7.24  | -7.77  | -7.77  | -4.01 | 1.29  | 1.84  | 7.51               | 7.33          | 5.19E-03      | 5.98E-03      |
| Gm16086    | -7.77  | -7.77  | -7.77  | -7.77  | -7.77  | -7.77  | -0.41 | -1.78 | 1.21  | 7.44               | 7.44          | 1.34E-03      | 1.34E-03      |
| Dmwd       | 2.58   | -7.77  | -6.99  | -6.81  | -4.81  | -5.56  | 3.33  | 2.77  | 3.41  | 7.25               | 8.88          | 4.93E-03      | 1.92E-03      |
| Sugct      | -4.68  | -7.77  | -7.77  | -7.77  | -1.22  | -3.96  | 0.81  | 0.77  | -0.07 | 7.25               | 4.81          | 3.82E-03      | 2.54E-02      |
| Smim3      | -6.99  | -1.25  | -7.77  | 1.58   | -7.77  | -5.56  | 1.76  | 0.34  | 3.62  | 7.21               | 5.83          | 1.44E-02      | 3.19E-02      |
| Syng1      | 1.09   | -7.77  | -6.99  | -7.77  | -4.05  | -0.02  | 2.85  | 3.49  | 1.49  | 7.20               | 6.57          | 1.00E-02      | 1.45E-02      |
| Homer2     | -7.77  | -7.77  | -7.77  | -7.77  | -7.77  | -7.77  | -7.77 | 2.52  | 3.11  | 7.11               | 7.11          | 4.21E-02      | 4.21E-02      |
| Sec1       | -7.77  | -7.77  | -7.77  | -7.77  | -7.77  | -7.77  | 2.99  | -7.77 | 2.85  | 7.08               | 7.08          | 4.55E-02      | 4.55E-02      |
| Ercc6l     | 0.50   | -3.38  | -6.99  | -7.77  | 2.43   | -5.56  | 3.57  | 3.43  | 4.29  | 7.06               | 7.37          | 7.70E-03      | 6.53E-03      |
| Hic2       | -4.68  | -7.77  | 1.23   | 2.95   | -5.73  | -5.11  | 1.51  | 4.34  | 3.92  | 7.06               | 5.95          | 1.84E-02      | 3.25E-02      |
| Pvrl2      | -7.77  | 2.76   | -7.77  | 1.67   | -4.81  | -7.77  | 2.30  | 2.56  | 3.49  | 7.01               | 6.43          | 2.02E-02      | 2.71E-02      |
| Vmn2r96    | 1.54   | -7.77  | -7.77  | -7.77  | -7.77  | -7.77  | 2.02  | 2.69  | 2.09  | 6.97               | 10.05         | 6.11E-03      | 8.01E-04      |
| Ncald      | -7.77  | -4.98  | 1.58   | -7.77  | -7.77  | -6.81  | 3.40  | 2.51  | 3.81  | 6.94               | 10.68         | 3.81E-03      | 3.71E-04      |
| Slc23a1    | -0.47  | -7.77  | -7.77  | -7.24  | -0.35  | -7.77  | 0.41  | 1.80  | 2.40  | 6.90               | 6.65          | 1.27E-02      | 1.49E-02      |
| Cacng4     | -7.77  | -7.77  | -7.77  | -7.77  | -7.77  | -7.77  | -0.95 | -0.09 | -1.60 | 6.89               | 6.89          | 1.72E-03      | 1.72E-03      |

| Gene        | Sample |        |        |        |        |        |       |       |       | Fold Change (Log2) |               | P-Value       |               |
|-------------|--------|--------|--------|--------|--------|--------|-------|-------|-------|--------------------|---------------|---------------|---------------|
|             | CtrlA1 | CtrlA2 | CtrlA3 | CtrlG1 | CtrlG2 | CtrlG3 | dKO1  | dKO2  | dKO3  | dKO vs. CtrlA      | dKO vs. CtrlG | dKO vs. CtrlA | dKO vs. CtrlG |
| Phf19       | -2.32  | 0.94   | -6.99  | -7.77  | -5.73  | -2.17  | 4.26  | 4.56  | 3.49  | 6.88               | 9.34          | 3.12E-03      | 7.50E-04      |
| AA386476    | -7.77  | -2.67  | -7.77  | -0.31  | -7.77  | -7.77  | 0.91  | 1.83  | -0.36 | 6.86               | 6.09          | 1.16E-02      | 1.92E-02      |
| Gipc3       | -6.99  | -7.77  | -4.88  | -7.77  | -7.77  | -6.81  | 0.36  | -1.25 | 1.67  | 6.80               | 7.70          | 2.79E-03      | 1.24E-03      |
| Rarb        | -6.99  | -7.77  | -3.32  | -7.24  | 0.70   | -7.77  | 1.08  | -0.47 | 1.62  | 6.77               | 5.49          | 1.38E-02      | 3.20E-02      |
| Zfp30       | -7.77  | -7.77  | 0.74   | -7.77  | -4.81  | -6.81  | 3.95  | 1.83  | -0.33 | 6.74               | 8.25          | 1.58E-02      | 6.53E-03      |
| Gm21992     | -4.15  | -7.77  | -6.34  | -3.25  | -7.77  | -7.77  | -2.38 | 2.18  | 1.86  | 6.68               | 6.85          | 1.08E-02      | 9.59E-03      |
| Pnoc        | -7.77  | -7.77  | -7.77  | -7.77  | -7.77  | -7.77  | 1.87  | -7.77 | 2.62  | 6.65               | 6.65          | 4.55E-02      | 4.55E-02      |
| Ccdc102a    | -4.87  | -1.98  | 2.03   | -5.46  | -7.77  | -5.11  | 3.51  | 6.01  | 5.48  | 6.63               | 11.15         | 1.32E-02      | 1.86E-03      |
| H19         | -7.77  | -4.98  | -7.77  | -7.77  | -7.77  | -7.77  | 2.79  | -5.27 | 1.93  | 6.61               | 7.55          | 2.76E-02      | 1.48E-02      |
| B3gnt9      | -7.77  | 3.25   | -7.77  | -7.24  | -5.73  | 2.24   | 1.14  | 2.45  | 3.77  | 6.53               | 6.06          | 3.96E-02      | 4.92E-02      |
| Atad3aos    | -3.71  | -7.77  | -7.77  | -1.28  | -7.77  | -7.77  | -1.63 | 0.44  | 1.40  | 6.51               | 5.70          | 1.35E-02      | 2.38E-02      |
| 5430402O13  | 0.24   | -7.77  | -6.99  | -3.45  | -7.77  | -7.77  | 0.11  | 2.28  | 2.11  | 6.38               | 7.85          | 1.26E-02      | 4.85E-03      |
| Gm16365     | -7.77  | -7.77  | -7.77  | -6.81  | -7.77  | -7.77  | -2.38 | 0.53  | -2.36 | 6.37               | 6.05          | 4.90E-03      | 6.63E-03      |
| Pole        | -5.54  | -4.98  | 2.64   | 1.50   | -4.05  | -7.77  | 3.40  | 3.73  | 4.00  | 6.35               | 7.16          | 1.19E-02      | 7.46E-03      |
| Ptpla       | -4.50  | -7.77  | -7.77  | -7.77  | -7.77  | -6.81  | 1.37  | 2.85  | -5.27 | 6.34               | 7.11          | 3.16E-02      | 1.89E-02      |
| Ccdc114     | -7.77  | 3.38   | -7.77  | -7.24  | 2.11   | -7.77  | 2.05  | 1.82  | 3.01  | 6.31               | 6.57          | 4.48E-02      | 3.94E-02      |
| A930029G22  | -7.77  | -2.67  | -7.77  | -0.24  | -7.77  | -7.77  | 1.01  | 0.77  | -1.32 | 6.21               | 5.42          | 2.28E-02      | 3.81E-02      |
| Lrrn4       | 0.95   | -4.98  | 0.01   | 1.29   | -5.73  | -4.81  | 4.38  | 4.92  | 5.14  | 6.20               | 7.92          | 4.01E-03      | 1.50E-03      |
| Fam131a     | -7.77  | -7.77  | -7.77  | -7.77  | -5.73  | -7.77  | -2.25 | -4.01 | 1.46  | 6.17               | 5.49          | 1.24E-02      | 2.21E-02      |
| 3110070M22  | -7.77  | -7.77  | -7.77  | -7.77  | -7.77  | -7.77  | -7.77 | 0.52  | 2.23  | 6.12               | 6.12          | 4.80E-02      | 4.80E-02      |
| Lat2        | 1.68   | -7.77  | -7.77  | -0.52  | -7.77  | -7.77  | 2.04  | 1.52  | 0.81  | 6.10               | 6.81          | 3.17E-02      | 2.11E-02      |
| Zfp239      | -1.56  | -2.67  | -2.12  | -7.24  | 2.64   | -5.11  | 3.60  | 3.44  | 4.85  | 6.08               | 7.17          | 8.44E-03      | 4.40E-03      |
| Leprel4     | -7.77  | -7.77  | -7.77  | -7.77  | -7.77  | -7.77  | 1.02  | -7.77 | 1.73  | 6.08               | 6.08          | 4.85E-02      | 4.85E-02      |
| Clspn       | -7.77  | 0.96   | -6.99  | -6.81  | -2.16  | -7.77  | 2.34  | 3.71  | -1.60 | 6.06               | 7.06          | 4.09E-02      | 2.38E-02      |
| Hist2h2be   | -0.85  | -7.77  | 0.01   | -6.58  | -0.25  | -5.56  | 3.52  | 2.61  | 3.37  | 6.06               | 7.27          | 9.87E-03      | 4.60E-03      |
| Arhgef40    | -6.99  | -4.98  | -7.77  | -6.81  | -5.73  | -6.81  | 1.93  | -5.27 | 1.90  | 6.06               | 5.93          | 3.25E-02      | 3.51E-02      |
| Kifc3       | -6.99  | -7.77  | -6.34  | -6.81  | -7.77  | -6.81  | 1.84  | -4.01 | -0.80 | 6.02               | 6.12          | 1.46E-02      | 1.34E-02      |
| Spag1       | -6.99  | -3.38  | -1.22  | -7.77  | 0.82   | -5.11  | 1.70  | 3.33  | 1.42  | 6.02               | 6.16          | 1.54E-02      | 1.40E-02      |
| Rims3       | 1.80   | -1.53  | -3.25  | 3.17   | -4.05  | -5.11  | 4.67  | 5.34  | 4.76  | 5.94               | 6.94          | 5.44E-03      | 3.20E-03      |
| Syde2       | -6.99  | -7.77  | -7.77  | -7.24  | -7.77  | -7.77  | -1.35 | -3.41 | -0.33 | 5.81               | 5.90          | 8.15E-03      | 7.51E-03      |
| Slc35f5     | -4.64  | -7.77  | -6.99  | -7.77  | -7.77  | -6.81  | 2.71  | 0.44  | -5.27 | 5.75               | 6.73          | 3.87E-02      | 1.97E-02      |
| Snora31     | -4.98  | -7.77  | -7.77  | -3.45  | -7.77  | -6.81  | -0.85 | -0.37 | -2.17 | 5.71               | 4.89          | 1.30E-02      | 2.59E-02      |
| 5730480H06  | -7.77  | -4.98  | -7.77  | -7.77  | -7.77  | -3.12  | 0.23  | 0.31  | -4.03 | 5.68               | 5.06          | 2.59E-02      | 4.06E-02      |
| Srsf12      | 2.77   | -7.77  | 0.89   | 1.09   | -5.73  | -6.81  | 3.66  | 4.91  | 4.03  | 5.65               | 8.04          | 2.65E-02      | 8.23E-03      |
| Gm8817      | -7.77  | 2.45   | -7.77  | -7.77  | -7.77  | -7.77  | 1.61  | 1.21  | 1.09  | 5.63               | 9.07          | 3.01E-02      | 3.25E-03      |
| Mtap7d3     | -7.77  | -4.98  | -6.99  | -7.77  | -7.77  | -7.77  | -5.33 | 1.38  | 1.00  | 5.62               | 6.82          | 3.42E-02      | 1.41E-02      |
| Mdk         | -7.77  | -7.77  | -3.25  | -7.77  | -7.77  | -3.96  | -1.67 | 1.31  | -1.67 | 5.60               | 5.84          | 2.10E-02      | 1.75E-02      |
| Hist4h4     | -0.13  | -7.77  | -7.77  | -7.77  | -7.77  | -7.77  | -0.24 | -0.13 | 1.27  | 5.54               | 8.07          | 2.16E-02      | 3.25E-03      |
| Tubb2b      | -4.64  | 4.51   | 0.79   | -4.93  | 2.83   | 1.32   | 6.03  | 5.20  | 6.09  | 5.43               | 5.98          | 1.71E-02      | 1.46E-02      |
| Gm12345     | -6.99  | -1.37  | -5.11  | -5.58  | -7.77  | -5.11  | 0.19  | 1.00  | 1.44  | 5.35               | 7.04          | 1.11E-02      | 2.83E-03      |
| Adam12      | -7.77  | -3.38  | -7.77  | -5.46  | -7.77  | -7.77  | -1.09 | -0.15 | -1.67 | 5.33               | 6.03          | 1.72E-02      | 9.39E-03      |
| Gm26792     | -6.99  | -7.77  | -6.34  | -7.77  | -7.77  | -5.56  | -4.01 | -1.17 | -0.10 | 5.28               | 5.28          | 1.93E-02      | 1.93E-02      |
| Gm26908     | -7.77  | 2.05   | -7.77  | -7.77  | -5.73  | -6.81  | 2.07  | 0.64  | -0.37 | 5.24               | 7.54          | 4.79E-02      | 1.15E-02      |
| 3830403N18  | 0.79   | -3.38  | -7.77  | 0.21   | -7.77  | -6.81  | 1.41  | 2.41  | 1.34  | 5.19               | 6.53          | 3.97E-02      | 1.72E-02      |
| Ap1m2       | 1.48   | -7.77  | 1.79   | -7.77  | -4.81  | 1.21   | 3.30  | 3.87  | 3.63  | 5.16               | 7.40          | 3.68E-02      | 1.11E-02      |
| Zfp683      | -7.77  | -4.98  | 0.06   | -7.77  | -7.77  | -7.77  | 2.71  | -0.69 | 0.48  | 5.04               | 8.59          | 3.14E-02      | 2.43E-03      |
| Dnajc27     | 2.64   | 3.29   | -5.56  | 1.72   | 1.44   | 2.44   | 5.50  | 5.02  | 5.03  | 5.02               | 3.32          | 1.05E-02      | 1.87E-02      |
| Ccl27a      | -0.69  | -7.77  | -4.00  | -0.50  | -7.77  | -7.77  | 0.32  | 0.99  | 1.07  | 4.98               | 6.16          | 4.39E-02      | 2.00E-02      |
| Syt13       | -1.00  | -3.38  | 1.95   | 1.58   | 2.62   | -7.77  | 3.91  | 4.01  | 4.36  | 4.94               | 5.25          | 2.83E-02      | 2.51E-02      |
| A930002I21F | 3.72   | 3.63   | -4.29  | 2.18   | 3.18   | 0.16   | 5.86  | 6.02  | 5.97  | 4.91               | 4.07          | 8.15E-03      | 9.22E-03      |
| Hdac9       | -0.69  | 1.09   | -1.36  | -0.24  | 1.01   | 4.41   | 4.54  | 4.58  | 4.63  | 4.88               | 2.88          | 4.42E-03      | 1.41E-02      |
| Tcf7l2      | 1.67   | -4.98  | 2.05   | 1.75   | -5.73  | 2.28   | 4.80  | 4.13  | 4.13  | 4.84               | 4.98          | 2.80E-02      | 2.63E-02      |
| Slc30a4     | -4.68  | 0.57   | 4.30   | 3.29   | 3.34   | -5.11  | 5.04  | 5.34  | 4.35  | 4.80               | 4.35          | 4.35E-02      | 4.96E-02      |
| Cxnc5       | 2.50   | -3.38  | 1.06   | 1.75   | 2.27   | 0.52   | 3.69  | 5.31  | 5.17  | 4.76               | 3.21          | 1.07E-02      | 2.41E-02      |
| Egfl8       | -1.66  | -0.74  | -6.99  | -0.27  | -7.77  | -7.77  | 1.23  | 1.60  | 1.90  | 4.70               | 6.86          | 4.27E-02      | 9.89E-03      |
| Gm23346     | -4.78  | -7.77  | -6.99  | -7.77  | -7.77  | -7.77  | -3.96 | -0.41 | -1.16 | 4.68               | 5.94          | 3.16E-02      | 1.02E-02      |
| Tlr12       | -4.98  | 4.11   | 2.77   | 0.48   | -3.25  | 3.86   | 5.96  | 4.71  | 5.58  | 4.66               | 5.10          | 3.45E-02      | 2.75E-02      |
| Slc16a5     | 1.52   | 0.81   | 2.44   | 3.41   | 4.38   | 2.02   | 6.07  | 5.60  | 6.93  | 4.63               | 2.88          | 3.45E-03      | 3.37E-03      |
| Stx2        | 1.20   | -1.67  | 2.96   | 3.90   | 2.07   | 2.87   | 5.70  | 5.58  | 4.61  | 4.51               | 2.38          | 4.89E-03      | 1.17E-02      |
| Gtf2ird1    | 2.98   | -1.81  | 0.19   | -4.18  | -3.58  | 3.35   | 4.77  | 4.11  | 5.53  | 4.40               | 6.28          | 1.67E-02      | 8.08E-03      |
| Fosl2       | -2.66  | -3.38  | 2.25   | 1.81   | 0.15   | -5.56  | 3.05  | 4.09  | 2.09  | 4.36               | 4.27          | 4.21E-02      | 4.48E-02      |
| Col15a1     | 1.48   | -1.42  | -5.56  | -5.58  | -0.40  | -3.73  | 3.00  | 2.47  | 1.75  | 4.24               | 5.62          | 3.44E-02      | 1.20E-02      |
| Griffin     | 0.63   | -4.98  | 2.18   | -6.81  | -4.81  | 0.07   | 3.02  | 3.91  | 3.27  | 4.19               | 7.27          | 3.30E-02      | 4.69E-03      |
| Ctstl       | -1.71  | 4.40   | 1.73   | 3.99   | 3.20   | 3.83   | 5.22  | 6.30  | 5.24  | 4.03               | 1.95          | 9.88E-03      | 1.76E-02      |
| A630091E08  | 2.35   | -2.23  | 3.21   | 1.68   | 2.22   | 2.32   | 4.95  | 4.49  | 5.66  | 3.99               | 2.95          | 8.75E-03      | 1.52E-02      |
| Aldh7a1     | 3.08   | 5.31   | -1.98  | 2.84   | -2.31  | 3.74   | 5.50  | 6.34  | 6.09  | 3.78               | 4.65          | 2.55E-02      | 2.00E-02      |
| Susd1       | 3.69   | -2.23  | 1.96   | 1.97   | -5.73  | -6.81  | 5.01  | 3.92  | 5.35  | 3.69               | 8.28          | 3.60E-02      | 5.33E-03      |
| Cd8a        | 5.08   | 4.23   | 5.67   | 3.72   | 4.76   | 4.66   | 8.47  | 8.61  | 8.48  | 3.56               | 4.13          | 6.30E-07      | 9.80E-07      |
| Rcn3        | 3.20   | 0.56   | 1.88   | 2.79   | -4.05  | 2.94   | 5.00  | 5.34  | 5.62  | 3.50               | 4.85          | 1.21E-02      | 7.33E-03      |
| Polh        | -2.58  | 0.88   | 3.59   | -5.58  | -4.81  | -1.43  | 4.45  | 3.23  | 4.80  | 3.48               | 8.09          | 3.18E-02      | 2.26E-03      |
| Ccr9        | 6.20   | 4.43   | 5.25   | 5.43   | 4.25   | 3.08   | 8.62  | 8.96  | 8.48  | 3.44               | 4.43          | 1.04E-05      | 2.15E-05      |
| Ampd1       | -0.22  | 2.92   | 2.17   | 1.75   | -0.71  | -5.56  | 5.20  | 4.46  | 5.27  | 3.29               | 6.46          | 1.36E-02      | 3.09E-03      |
| Gpr56       | 3.05   | 2.71   | 3.41   | 2.87   | 4.51   | 2.89   | 6.01  | 6.92  | 5.98  | 3.27               | 2.84          | 1.01E-03      | 1.08E-03      |
| Trpm1       | 3.68   | 3.93   | 3.93   | 5.23   | 5.02   | 4.97   | 7.20  | 6.81  | 6.98  | 3.14               | 1.92          | 7.30E-06      | 1.90E-05      |
| Tfrc        | 5.36   | -1.53  | 3.81   | 3.25   | -2.82  | 4.26   | 5.71  | 5.35  | 5.46  | 3.13               | 4.05          | 4.84E-02      | 4.49E-02      |

| Gene      | Sample |        |        |        |        |        |      |      |      | Fold Change (Log2) |               | P-Value       |               |
|-----------|--------|--------|--------|--------|--------|--------|------|------|------|--------------------|---------------|---------------|---------------|
|           | CtrlA1 | CtrlA2 | CtrlA3 | CtrlG1 | CtrlG2 | CtrlG3 | dKO1 | dKO2 | dKO3 | dKO vs. CtrlA      | dKO vs. CtrlG | dKO vs. CtrlA | dKO vs. CtrlG |
| Tmem108   | 3.59   | 1.03   | 2.05   | 2.56   | 1.76   | 3.09   | 5.01 | 5.33 | 5.53 | 3.13               | 2.85          | 1.77E-03      | 2.07E-03      |
| Mex3a     | 3.75   | 1.34   | 2.14   | 0.67   | 3.03   | 1.94   | 4.58 | 5.30 | 6.24 | 3.03               | 3.48          | 1.04E-02      | 9.89E-03      |
| Sox4      | 3.55   | 1.85   | 3.36   | 4.18   | 4.15   | 4.83   | 6.01 | 5.85 | 5.81 | 3.02               | 1.51          | 3.63E-04      | 1.79E-03      |
| Prdm11    | 2.70   | 4.21   | -0.85  | 2.58   | 2.06   | 4.56   | 4.84 | 4.96 | 5.24 | 2.95               | 2.00          | 2.13E-02      | 3.37E-02      |
| Igfb2     | 5.19   | 5.15   | 4.83   | 5.41   | 5.31   | 5.85   | 7.56 | 7.98 | 7.98 | 2.79               | 2.33          | 2.35E-06      | 3.45E-06      |
| Cmah      | 5.96   | 2.78   | 5.54   | 6.42   | 5.73   | 6.58   | 7.53 | 7.77 | 7.02 | 2.78               | 1.22          | 1.39E-03      | 1.80E-02      |
| Fam213a   | 0.94   | 0.95   | 3.42   | -5.34  | -2.16  | 4.03   | 4.17 | 5.00 | 4.33 | 2.75               | 5.69          | 4.22E-02      | 9.63E-03      |
| Tspan6    | 2.74   | 3.43   | 2.18   | 2.18   | 3.41   | -1.89  | 5.06 | 5.76 | 5.68 | 2.70               | 4.23          | 6.35E-03      | 3.92E-03      |
| D17H6553E | 0.86   | 1.69   | -0.23  | -0.37  | 0.80   | 2.40   | 3.99 | 3.17 | 3.16 | 2.64               | 2.49          | 2.72E-02      | 3.14E-02      |
| Art4      | 3.46   | 4.93   | -0.47  | 3.33   | 1.74   | 3.07   | 4.50 | 5.91 | 5.45 | 2.60               | 2.63          | 3.90E-02      | 3.36E-02      |
| Zfp580    | 0.43   | 3.00   | 2.19   | 2.75   | 1.46   | 2.78   | 4.17 | 4.91 | 4.23 | 2.53               | 2.15          | 1.34E-02      | 1.77E-02      |
| Dcaf4     | 1.46   | 3.41   | 4.87   | 3.70   | 4.63   | 3.61   | 5.49 | 5.73 | 6.11 | 2.50               | 1.77          | 4.97E-03      | 8.75E-03      |
| Gm19705   | 0.31   | 2.07   | 1.57   | -7.24  | -5.73  | -2.58  | 2.85 | 3.92 | 4.50 | 2.43               | 8.96          | 3.92E-02      | 3.11E-04      |
| Gadd45g   | 3.57   | 2.85   | 3.37   | 3.33   | 3.44   | 3.82   | 5.24 | 5.55 | 6.10 | 2.40               | 2.11          | 1.14E-03      | 1.44E-03      |
| Slc43a1   | 1.35   | 3.50   | 3.74   | -5.58  | 3.14   | -5.11  | 5.28 | 5.53 | 5.03 | 2.37               | 7.76          | 2.00E-02      | 2.11E-03      |
| Cd8b1     | 4.94   | 6.43   | 4.88   | 3.91   | 5.85   | 4.67   | 7.89 | 7.61 | 7.88 | 2.33               | 2.94          | 1.84E-04      | 1.11E-04      |
| Cd160     | 4.65   | 3.29   | 5.39   | 3.00   | 4.69   | 1.89   | 6.73 | 6.58 | 6.75 | 2.29               | 3.43          | 8.31E-04      | 9.07E-04      |
| Tm6sf1    | 3.84   | 3.41   | 3.73   | 1.54   | 4.13   | -2.28  | 5.93 | 6.50 | 5.34 | 2.29               | 4.74          | 7.09E-03      | 5.32E-03      |
| Plscr3    | 4.89   | 4.12   | 4.01   | 5.28   | 5.82   | 3.37   | 6.44 | 6.37 | 6.79 | 2.21               | 1.67          | 2.57E-03      | 6.12E-03      |
| Zfp850    | 4.16   | 4.24   | 0.49   | 4.74   | 1.58   | 3.64   | 5.18 | 4.96 | 5.43 | 2.20               | 1.94          | 4.14E-02      | 4.33E-02      |
| Colq      | 4.55   | 4.78   | 3.54   | 5.30   | 5.12   | 5.64   | 6.52 | 6.25 | 6.67 | 2.17               | 1.14          | 2.23E-04      | 2.99E-03      |
| Trim32    | 3.87   | 3.91   | 2.78   | 4.83   | 3.56   | 4.60   | 5.85 | 6.07 | 5.03 | 2.12               | 1.35          | 5.89E-03      | 1.76E-02      |
| Arhgap20  | 2.87   | 4.81   | 5.05   | 5.35   | 3.35   | 6.17   | 6.63 | 5.99 | 6.49 | 2.07               | 1.46          | 1.79E-02      | 3.42E-02      |
| Ehd1      | 6.09   | 5.93   | 4.40   | 5.48   | 4.75   | 5.34   | 7.47 | 7.39 | 7.77 | 2.07               | 2.37          | 2.01E-04      | 1.20E-04      |
| Usp11     | 3.63   | 5.83   | 3.98   | 3.25   | 5.34   | 5.25   | 6.38 | 6.39 | 7.01 | 2.05               | 1.95          | 6.76E-03      | 6.85E-03      |
| Tspyl3    | 5.89   | 3.94   | 5.89   | 6.29   | 5.43   | 4.38   | 7.03 | 7.41 | 7.19 | 2.04               | 1.84          | 2.18E-03      | 3.26E-03      |
| Prf1      | 3.99   | 4.44   | 4.29   | 5.25   | 4.55   | 3.53   | 5.65 | 6.40 | 6.76 | 2.03               | 1.83          | 2.84E-03      | 3.63E-03      |
| Paox      | 2.34   | 1.98   | 2.46   | 0.52   | 1.42   | 1.91   | 4.10 | 4.63 | 4.01 | 2.00               | 2.97          | 1.38E-02      | 4.45E-03      |
| Timeless  | 2.99   | 5.46   | 3.25   | 3.70   | 5.58   | 2.94   | 5.99 | 6.20 | 5.74 | 1.99               | 1.84          | 1.53E-02      | 1.71E-02      |
| Zswim4    | 4.12   | 3.93   | 1.93   | 5.41   | 2.57   | 3.51   | 5.40 | 5.12 | 5.46 | 1.99               | 1.54          | 2.46E-02      | 3.72E-02      |
| Lysmd1    | 2.37   | 2.62   | 2.03   | 2.34   | 3.02   | 1.33   | 4.17 | 4.49 | 3.94 | 1.85               | 1.95          | 2.10E-02      | 1.85E-02      |
| Eno3      | 5.59   | 4.15   | 5.49   | 5.39   | 4.39   | 6.12   | 6.58 | 6.71 | 7.28 | 1.82               | 1.59          | 3.30E-03      | 5.20E-03      |
| Hmgn2     | 6.39   | 6.44   | 5.70   | 6.25   | 6.71   | 6.01   | 8.05 | 8.07 | 7.89 | 1.82               | 1.66          | 1.46E-05      | 2.27E-05      |
| Gm19585   | 3.50   | 3.36   | 4.32   | 3.99   | 3.82   | 4.60   | 5.04 | 5.59 | 5.93 | 1.81               | 1.41          | 4.15E-03      | 8.70E-03      |
| Anxa4     | 3.62   | 3.73   | 4.53   | 4.75   | 3.65   | 3.31   | 6.18 | 5.47 | 5.66 | 1.80               | 1.86          | 3.31E-03      | 2.89E-03      |
| Nkg7      | 6.25   | 6.25   | 5.88   | 5.56   | 6.75   | 5.82   | 7.83 | 7.94 | 7.97 | 1.79               | 1.85          | 3.58E-05      | 3.08E-05      |
| Wdr41     | 5.29   | 4.10   | 3.60   | 5.73   | 4.80   | 4.61   | 6.13 | 6.36 | 5.75 | 1.78               | 1.04          | 3.94E-03      | 2.50E-02      |
| H2-Oa     | 3.10   | 4.17   | 4.44   | 3.61   | 4.58   | 4.53   | 5.06 | 5.90 | 6.10 | 1.77               | 1.45          | 7.74E-03      | 1.31E-02      |
| Ddx31     | 5.11   | 5.42   | 2.13   | 4.74   | 4.08   | 3.62   | 6.07 | 5.85 | 5.97 | 1.71               | 1.81          | 2.29E-02      | 1.89E-02      |
| Prr3      | 4.32   | 4.76   | 2.82   | 4.28   | 3.96   | 3.42   | 5.60 | 6.29 | 5.12 | 1.69               | 1.78          | 1.41E-02      | 1.16E-02      |
| Hes6      | 5.28   | 4.01   | 5.31   | 4.42   | 5.62   | 4.79   | 6.06 | 6.61 | 6.65 | 1.62               | 1.48          | 3.25E-03      | 4.91E-03      |
| Phc1      | 3.14   | 3.39   | 3.86   | 3.65   | 0.42   | 3.02   | 4.89 | 4.51 | 5.87 | 1.61               | 2.78          | 3.64E-02      | 1.25E-02      |
| Msh3      | 4.39   | 4.47   | 5.51   | 4.12   | 5.30   | 3.64   | 6.82 | 5.85 | 6.48 | 1.58               | 1.98          | 6.25E-03      | 3.29E-03      |
| Ctsw      | 6.48   | 6.96   | 5.95   | 6.87   | 6.90   | 7.22   | 7.86 | 8.18 | 8.13 | 1.58               | 1.07          | 5.62E-05      | 4.85E-04      |
| Acap3     | 3.79   | 3.25   | 3.63   | 3.50   | -1.32  | -1.48  | 4.88 | 5.47 | 4.87 | 1.54               | 4.87          | 2.29E-02      | 2.34E-03      |
| Dda1      | 6.94   | 5.31   | 6.14   | 6.88   | 6.32   | 5.98   | 7.18 | 7.77 | 7.85 | 1.52               | 1.21          | 2.30E-03      | 6.23E-03      |
| Mbip      | 2.92   | 4.27   | 4.85   | 3.83   | 3.21   | 5.16   | 5.65 | 5.46 | 5.53 | 1.50               | 1.52          | 1.95E-02      | 1.67E-02      |
| Cox18     | 3.07   | 4.04   | 4.54   | 3.75   | 3.38   | 2.87   | 5.17 | 5.55 | 5.44 | 1.49               | 2.05          | 7.21E-03      | 2.74E-03      |
| Prnp      | 3.88   | 5.67   | 5.33   | 4.98   | 5.71   | 4.56   | 6.21 | 6.42 | 6.82 | 1.48               | 1.38          | 7.41E-03      | 8.99E-03      |
| Gsn       | 3.64   | 6.05   | 4.86   | 5.11   | 5.62   | 5.19   | 6.29 | 6.03 | 6.82 | 1.46               | 1.06          | 1.43E-02      | 3.69E-02      |
| Agpat4    | 5.26   | 3.64   | 3.25   | 3.73   | 3.75   | 4.13   | 5.63 | 5.70 | 5.05 | 1.45               | 1.60          | 1.51E-02      | 1.18E-02      |
| Ten1      | 4.43   | 4.80   | 5.04   | 5.06   | 5.35   | 4.98   | 5.96 | 6.07 | 6.54 | 1.43               | 1.05          | 1.27E-03      | 4.93E-03      |
| Tab1      | 6.14   | 3.68   | 3.55   | 4.75   | 3.20   | 4.84   | 5.59 | 6.00 | 5.86 | 1.43               | 1.60          | 3.74E-02      | 2.80E-02      |
| Rras2     | 6.28   | 7.09   | 4.93   | 6.24   | 6.13   | 6.41   | 7.61 | 7.34 | 7.69 | 1.41               | 1.29          | 4.41E-03      | 6.08E-03      |
| Zfp707    | 4.71   | 4.12   | 3.01   | 3.69   | 4.94   | 3.61   | 5.67 | 4.98 | 5.42 | 1.41               | 1.23          | 2.28E-02      | 3.44E-02      |
| Heatr2    | 5.23   | 5.15   | 3.61   | 4.59   | 5.52   | 3.76   | 6.20 | 6.11 | 5.86 | 1.38               | 1.40          | 1.57E-02      | 1.55E-02      |
| Dcun1d2   | 6.15   | 5.29   | 3.72   | 5.41   | 3.50   | 5.90   | 6.12 | 6.41 | 6.64 | 1.35               | 1.51          | 4.53E-02      | 3.17E-02      |
| Arl3      | 3.72   | 2.92   | 3.11   | 2.99   | 2.71   | 2.28   | 4.65 | 4.44 | 4.66 | 1.35               | 1.92          | 2.06E-02      | 7.64E-03      |
| Gm20324   | 4.90   | 4.20   | 3.58   | 3.74   | 4.12   | 3.37   | 5.23 | 5.51 | 5.93 | 1.35               | 1.80          | 9.67E-03      | 3.96E-03      |
| Zfp422    | 4.58   | 5.02   | 4.97   | 5.23   | 4.46   | 4.95   | 6.08 | 6.19 | 6.34 | 1.33               | 1.34          | 1.22E-03      | 1.10E-03      |
| Acp5      | 7.78   | 7.01   | 7.95   | 7.68   | 7.80   | 7.72   | 8.94 | 8.74 | 8.99 | 1.33               | 1.15          | 5.29E-05      | 1.26E-04      |
| Foxn2     | 5.42   | 4.34   | 4.49   | 6.16   | 3.36   | 4.66   | 6.11 | 6.10 | 5.94 | 1.33               | 1.37          | 3.30E-02      | 2.88E-02      |
| Trak2     | 5.58   | 5.65   | 4.14   | 4.93   | 5.56   | 5.33   | 6.19 | 6.57 | 6.47 | 1.28               | 1.13          | 6.77E-03      | 1.08E-02      |
| Traf4     | 5.60   | 5.40   | 5.50   | 5.35   | 5.28   | 5.59   | 6.59 | 7.25 | 6.40 | 1.26               | 1.35          | 1.84E-03      | 1.28E-03      |
| Acss1     | 6.53   | 5.77   | 6.28   | 6.79   | 6.41   | 5.43   | 7.17 | 7.31 | 7.81 | 1.25               | 1.21          | 3.77E-03      | 4.48E-03      |
| Slc25a4   | 7.84   | 7.94   | 8.15   | 7.53   | 7.89   | 8.12   | 9.10 | 9.19 | 9.36 | 1.24               | 1.37          | 7.54E-06      | 3.77E-06      |
| Rb1       | 6.73   | 4.96   | 6.98   | 6.55   | 6.15   | 6.36   | 7.62 | 7.21 | 7.40 | 1.23               | 1.06          | 1.18E-02      | 2.16E-02      |
| Lphn1     | 4.00   | 4.85   | 4.30   | 4.02   | 3.81   | 3.43   | 6.16 | 5.37 | 5.39 | 1.23               | 1.88          | 1.20E-02      | 2.81E-03      |
| Sbk1      | 7.38   | 7.89   | 6.54   | 7.59   | 7.13   | 7.50   | 8.67 | 8.38 | 8.45 | 1.21               | 1.10          | 1.02E-03      | 1.54E-03      |
| Mvd       | 4.56   | 5.29   | 5.09   | 5.24   | 5.79   | 3.57   | 5.93 | 6.44 | 6.22 | 1.20               | 1.30          | 2.47E-02      | 1.94E-02      |
| Pigp      | 5.01   | 3.89   | 4.54   | 4.60   | 4.41   | 4.54   | 5.73 | 5.31 | 5.89 | 1.19               | 1.13          | 9.77E-03      | 1.23E-02      |
| Ubxn7     | 5.20   | 5.45   | 4.10   | 4.13   | 4.36   | 3.89   | 5.52 | 6.69 | 6.05 | 1.17               | 1.97          | 2.25E-02      | 4.28E-03      |
| Marcks11  | 3.37   | 4.21   | 3.44   | 3.88   | 2.62   | 3.67   | 4.97 | 4.81 | 4.82 | 1.17               | 1.51          | 3.19E-02      | 1.37E-02      |
| Npc1      | 5.57   | 4.41   | 3.88   | 5.02   | 3.92   | 4.95   | 5.62 | 5.90 | 5.69 | 1.14               | 1.14          | 2.62E-02      | 2.59E-02      |
| Kctd5     | 4.82   | 5.34   | 5.30   | 4.79   | 4.63   | 4.97   | 5.83 | 6.27 | 6.81 | 1.14               | 1.52          | 6.95E-03      | 1.99E-03      |

| Gene     | Sample |        |        |        |        |        |       |      |       | Fold Change (Log2) |               | P-Value       |               |
|----------|--------|--------|--------|--------|--------|--------|-------|------|-------|--------------------|---------------|---------------|---------------|
|          | CtrlA1 | CtrlA2 | CtrlA3 | CtrlG1 | CtrlG2 | CtrlG3 | dKO1  | dKO2 | dKO3  | dKO vs. CtrlA      | dKO vs. CtrlG | dKO vs. CtrlA | dKO vs. CtrlG |
| Tubb2a   | 5.48   | 5.59   | 5.65   | 5.16   | 5.07   | 4.95   | 6.60  | 6.15 | 7.41  | 1.14               | 1.66          | 9.53E-03      | 2.04E-03      |
| Dmap1    | 4.44   | 4.79   | 3.40   | 4.10   | 3.89   | 4.34   | 5.25  | 5.33 | 5.52  | 1.14               | 1.27          | 1.91E-02      | 1.24E-02      |
| Obfc1    | 3.89   | 5.09   | 3.76   | 4.76   | 3.56   | 3.87   | 5.17  | 5.19 | 5.83  | 1.11               | 1.35          | 3.98E-02      | 2.05E-02      |
| Itgae    | 8.13   | 6.98   | 8.42   | 7.78   | 8.04   | 7.26   | 8.80  | 8.85 | 9.06  | 1.10               | 1.20          | 3.86E-03      | 2.65E-03      |
| Mad2l1bp | 4.09   | 4.85   | 5.21   | 5.17   | 3.95   | 5.47   | 5.88  | 5.78 | 5.84  | 1.10               | 1.01          | 2.65E-02      | 3.30E-02      |
| Cnn3     | 6.23   | 6.21   | 5.86   | 6.31   | 6.11   | 5.99   | 6.82  | 7.42 | 7.32  | 1.09               | 1.06          | 1.03E-03      | 1.20E-03      |
| Tmem60   | 4.60   | 4.87   | 4.26   | 5.15   | 4.23   | 3.46   | 5.36  | 5.52 | 6.14  | 1.09               | 1.40          | 2.86E-02      | 1.23E-02      |
| Aagab    | 5.79   | 6.05   | 5.93   | 6.38   | 3.70   | 5.12   | 6.84  | 6.58 | 7.49  | 1.04               | 1.95          | 3.57E-02      | 3.90E-03      |
| Cdc14b   | 4.68   | 5.14   | 4.23   | 2.88   | -4.81  | -3.83  | 1.61  | 3.22 | 2.83  | -2.13              | 4.51          | 3.62E-02      | 3.38E-02      |
| Trip10   | 3.35   | 4.44   | 3.04   | -7.77  | -7.77  | -7.77  | -4.79 | 4.36 | -2.27 | -4.51              | 6.91          | 2.71E-02      | 2.87E-02      |

<sup>1</sup> Table S1: Genes over-expressed in dKO vs. genetic (CtrlG) or animal (CtrlA) Tregs, as defined in Fig. 6A. Normalized expression (Log2 values) is given for each gene in each of the three independent replicates for each genotype. Log2 values of Fold change (FC) and p-values are given for indicated comparisons.



Table S2: Under-expressed genes <sup>1</sup>

| Gene        | Sample |        |        |        |        |        |       |       |       | Fold Change (Log2) |               | P-Value       |               |
|-------------|--------|--------|--------|--------|--------|--------|-------|-------|-------|--------------------|---------------|---------------|---------------|
|             | CtrlA1 | CtrlA2 | CtrlA3 | CtrlG1 | CtrlG2 | CtrlG3 | dKO1  | dKO2  | dKO3  | dKO vs. CtrlA      | dKO vs. CtrlG | dKO vs. CtrlA | dKO vs. CtrlG |
| Il9r        | 3.53   | 4.36   | 3.99   | 3.24   | 3.86   | 1.92   | -7.77 | -7.77 | -7.77 | -11.76             | -10.81        | 2.08E-05      | 5.40E-05      |
| Fam160a1    | 5.13   | 4.28   | 5.78   | 3.70   | 1.21   | 2.63   | -7.77 | -7.77 | -3.42 | -11.36             | -8.79         | 2.43E-04      | 2.43E-03      |
| Il1r2       | 6.35   | 5.87   | 6.24   | 4.35   | 4.05   | 4.16   | -6.38 | -4.01 | -5.27 | -11.35             | -9.39         | 9.17E-06      | 5.56E-05      |
| Arc         | 3.75   | 4.16   | 4.70   | 3.78   | 4.91   | 3.36   | -4.64 | -7.77 | -7.77 | -10.94             | -10.79        | 9.30E-05      | 1.07E-04      |
| Map6        | 4.78   | 3.92   | 4.42   | 5.37   | 3.99   | 0.80   | -7.77 | -4.01 | -7.77 | -10.86             | -9.94         | 1.50E-03      | 3.12E-03      |
| Stxbp1      | 3.27   | 4.18   | 3.04   | 1.29   | 3.27   | 1.85   | -6.38 | -7.77 | -7.77 | -10.84             | -9.48         | 4.22E-05      | 1.96E-04      |
| Gcat        | 5.15   | 4.19   | 4.94   | 0.64   | 3.10   | 4.32   | -7.77 | -5.27 | -5.27 | -10.83             | -8.79         | 2.39E-04      | 1.64E-03      |
| Klrg1       | 6.04   | 5.73   | 4.83   | 1.83   | 3.94   | 5.47   | -6.38 | -5.27 | -4.03 | -10.75             | -8.97         | 1.20E-03      | 4.61E-03      |
| Ttn         | 3.08   | 3.73   | 4.06   | 4.24   | 5.32   | 4.83   | -7.77 | -5.27 | -7.77 | -10.57             | -11.75        | 8.25E-05      | 2.84E-05      |
| Gpr160      | 2.88   | 3.50   | 1.90   | -6.81  | -0.50  | -0.45  | -7.77 | -7.77 | -7.77 | -10.56             | -5.20         | 2.24E-04      | 4.96E-02      |
| Ryk         | 4.01   | 3.72   | 1.88   | -0.78  | 1.65   | 1.20   | -6.38 | -7.77 | -7.77 | -10.51             | -8.01         | 1.27E-04      | 2.13E-03      |
| Car5b       | 2.91   | 3.06   | 1.57   | 1.83   | 3.83   | -4.81  | -7.77 | -7.77 | -7.77 | -10.30             | -8.12         | 1.67E-03      | 1.26E-02      |
| 2810039B14  | 2.41   | 1.88   | 3.12   | 1.26   | -5.73  | 1.60   | -7.77 | -7.77 | -7.77 | -10.22             | -6.76         | 5.94E-04      | 1.92E-02      |
| Cxcr6       | 5.81   | 6.38   | 6.59   | 4.56   | 6.30   | 4.85   | -6.38 | -2.58 | -2.88 | -10.21             | -9.22         | 7.42E-04      | 1.60E-03      |
| Ptpn5       | 4.61   | 3.13   | 0.80   | 3.36   | 4.15   | 4.23   | -6.38 | -7.77 | -7.77 | -10.13             | -11.23        | 5.40E-04      | 1.89E-04      |
| Pstpip2     | 1.67   | 2.64   | 2.64   | 0.52   | 2.79   | 1.89   | -7.77 | -7.77 | -7.77 | -10.11             | -9.53         | 6.99E-05      | 1.40E-04      |
| Il1r1       | 4.55   | 3.37   | 4.86   | 3.37   | 3.43   | 3.20   | -5.33 | -7.77 | -4.03 | -9.93              | -9.05         | 1.34E-04      | 3.34E-04      |
| Lgmn        | 3.11   | 5.01   | 3.06   | 4.09   | 2.87   | 3.04   | -7.77 | -2.90 | -7.77 | -9.93              | -9.46         | 4.77E-04      | 7.41E-04      |
| Csf1        | 4.45   | 5.52   | 4.96   | 4.84   | 5.41   | 4.14   | -7.77 | -4.01 | -2.76 | -9.85              | -9.66         | 3.11E-04      | 3.65E-04      |
| Zpbbp2      | 1.34   | 1.30   | 2.88   | -7.77  | 2.79   | 1.01   | -7.77 | -7.77 | -7.77 | -9.61              | -6.48         | 3.48E-03      | 4.97E-02      |
| Lilrb4      | 3.15   | 2.86   | 2.00   | 1.66   | 2.49   | 2.69   | -7.77 | -7.77 | -5.27 | -9.60              | -9.22         | 8.29E-05      | 1.32E-04      |
| Cysltr2     | 2.53   | 2.48   | 0.14   | 2.51   | 2.37   | -7.77  | -7.77 | -7.77 | -7.77 | -9.50              | -6.85         | 5.87E-03      | 4.98E-02      |
| Ddr1        | 3.88   | 4.11   | 1.01   | 2.42   | 3.21   | 2.80   | -6.38 | -5.27 | -7.77 | -9.50              | -9.29         | 6.39E-04      | 7.86E-04      |
| Scrn3       | 3.57   | 5.03   | 4.96   | 2.06   | 4.48   | 3.57   | -1.39 | -7.77 | -5.27 | -9.38              | -8.23         | 1.07E-03      | 3.07E-03      |
| Gdap10      | 4.67   | 4.22   | 3.47   | 4.15   | 3.57   | -3.83  | -6.38 | -4.01 | -5.27 | -9.33              | -6.57         | 3.74E-03      | 4.04E-02      |
| Atcay       | 3.81   | 1.45   | 3.48   | 2.73   | 3.67   | -5.11  | -6.38 | -7.77 | -5.27 | -9.32              | -6.96         | 5.60E-03      | 4.09E-02      |
| Tbx21       | 1.63   | 3.27   | 2.91   | -2.10  | 1.21   | 2.69   | -7.77 | -7.77 | -4.03 | -9.16              | -7.13         | 7.58E-04      | 6.95E-03      |
| Crip2       | 2.02   | 3.04   | 2.23   | 2.00   | 3.30   | 2.07   | -6.38 | -5.27 | -7.77 | -8.92              | -8.96         | 1.68E-04      | 1.60E-04      |
| Axl         | 6.23   | 6.14   | 6.71   | 4.18   | 5.60   | 4.78   | -5.33 | 3.16  | -5.27 | -8.81              | -7.34         | 1.35E-03      | 4.77E-03      |
| Ppm1j       | 2.79   | 5.19   | 5.13   | 4.17   | 4.03   | 3.44   | -7.77 | 2.95  | -7.77 | -8.61              | -8.07         | 7.65E-03      | 1.15E-02      |
| Rnls        | 2.05   | 2.84   | 3.35   | 0.06   | 2.59   | -0.15  | -7.77 | -7.77 | -1.95 | -8.59              | -6.69         | 7.83E-04      | 7.05E-03      |
| Zbtb7b      | 6.26   | 6.72   | 6.62   | 6.53   | 6.69   | 7.22   | -1.45 | -1.91 | -2.76 | -8.59              | -8.85         | 1.55E-04      | 1.21E-04      |
| Atxn1       | 4.27   | 4.69   | 1.35   | 2.67   | 4.65   | 2.13   | -7.77 | -2.24 | -5.27 | -8.55              | -8.30         | 5.15E-03      | 6.50E-03      |
| March3      | 4.90   | 4.15   | 3.74   | 2.30   | 2.60   | 3.90   | -7.77 | -7.77 | 3.09  | -8.40              | -7.07         | 3.46E-03      | 1.19E-02      |
| Dcxr        | 3.07   | 3.87   | 3.72   | 1.31   | 2.02   | 2.34   | -7.77 | -5.27 | -1.39 | -8.38              | -6.70         | 3.41E-04      | 2.80E-03      |
| Ebi3        | 4.42   | 4.52   | 3.95   | 3.95   | 4.77   | 2.09   | -6.38 | 2.09  | -7.77 | -8.31              | -7.67         | 3.87E-03      | 6.91E-03      |
| Gdpd5       | 4.56   | 5.26   | 4.33   | 3.95   | 2.64   | 4.88   | -5.33 | -7.77 | 2.96  | -8.12              | -7.15         | 4.56E-03      | 1.05E-02      |
| Lgals3      | 3.82   | 5.01   | 3.47   | 1.78   | 5.15   | 3.41   | -6.38 | -0.09 | -5.27 | -8.04              | -7.42         | 4.70E-03      | 8.35E-03      |
| Atp5s       | 1.55   | -0.60  | 2.26   | 0.17   | 3.99   | 0.36   | -5.33 | -7.77 | -7.77 | -7.99              | -8.52         | 3.43E-03      | 1.99E-03      |
| Gpr19       | 2.72   | -2.67  | 3.33   | 1.76   | 2.67   | 2.92   | -7.77 | -5.27 | -7.77 | -7.98              | -9.39         | 6.74E-03      | 1.65E-03      |
| Ccr2        | 6.56   | 2.67   | 4.97   | 5.51   | 6.28   | 4.46   | 0.84  | -7.77 | -2.58 | -7.81              | -8.64         | 4.19E-02      | 2.65E-02      |
| Cpe         | -3.49  | 3.77   | 4.40   | 3.20   | 3.21   | -1.22  | -5.33 | -5.27 | -7.77 | -7.79              | -7.90         | 3.23E-02      | 2.93E-02      |
| Irak3       | 4.60   | -2.67  | 4.47   | 2.71   | 3.98   | 3.88   | -5.33 | -4.01 | -7.77 | -7.66              | -9.25         | 2.97E-02      | 8.78E-03      |
| Nr3c2       | 2.38   | -3.38  | 0.88   | -5.34  | 3.25   | -0.05  | -7.77 | -7.77 | -7.77 | -7.66              | -7.11         | 1.88E-02      | 3.03E-02      |
| Tube1       | 2.78   | -0.89  | 4.03   | 2.61   | 2.72   | 2.64   | -6.38 | -3.12 | -7.77 | -7.64              | -8.42         | 5.34E-03      | 2.37E-03      |
| Acot11      | 3.64   | 1.59   | -3.17  | 3.13   | 3.88   | 4.08   | -7.77 | -7.77 | -5.27 | -7.61              | -10.64        | 9.27E-03      | 4.58E-04      |
| Tox2        | 4.76   | 3.82   | 5.08   | 3.84   | 3.50   | 1.89   | 2.75  | -4.01 | -7.77 | -7.55              | -6.12         | 4.69E-03      | 1.86E-02      |
| Ly6d        | 2.48   | 3.07   | 1.14   | 0.99   | 2.57   | 0.22   | -5.33 | -2.68 | -7.77 | -7.51              | -6.55         | 1.49E-03      | 4.89E-03      |
| Cxcl10      | 2.22   | 2.28   | 1.50   | 2.87   | 0.40   | 1.80   | -6.38 | -7.77 | -2.21 | -7.46              | -7.11         | 1.62E-03      | 2.45E-03      |
| Sarm1       | 3.97   | -2.67  | 1.82   | 1.71   | 2.05   | 2.13   | -7.77 | -4.01 | -7.77 | -7.46              | -8.48         | 1.02E-02      | 3.76E-03      |
| Klhl5       | 0.95   | -1.32  | 3.27   | 3.20   | 3.78   | 4.14   | -7.77 | -4.01 | -7.77 | -7.44              | -10.23        | 4.59E-03      | 2.22E-04      |
| Pou6f1      | 3.31   | 5.16   | 4.10   | 3.45   | 4.64   | 3.34   | 3.68  | -7.77 | -5.27 | -7.39              | -6.99         | 9.18E-03      | 1.30E-02      |
| A630023P12  | 3.90   | 3.88   | 3.80   | 3.43   | 3.43   | 1.66   | 2.57  | -7.77 | -5.27 | -7.36              | -6.37         | 3.77E-03      | 1.09E-02      |
| Chn2        | 3.51   | 3.20   | 4.17   | 2.27   | 4.17   | 1.55   | -6.38 | -7.77 | 3.07  | -7.30              | -6.41         | 7.72E-03      | 1.89E-02      |
| Tigt        | 4.86   | 4.70   | 5.25   | 3.54   | 4.55   | 1.92   | -4.14 | -1.53 | -1.32 | -7.25              | -5.72         | 9.02E-04      | 5.58E-03      |
| Tnfrsf14    | 4.57   | 3.73   | 3.74   | 3.31   | 0.22   | 4.04   | -3.18 | -5.27 | -1.26 | -7.23              | -5.68         | 2.50E-03      | 1.43E-02      |
| Melk        | 0.78   | 3.23   | 2.12   | 2.30   | 3.07   | 3.88   | -7.77 | -7.77 | 0.31  | -7.17              | -8.16         | 6.89E-03      | 2.30E-03      |
| Rhbf2       | -0.08  | 4.04   | 3.18   | 5.27   | 0.68   | 1.72   | -5.33 | -3.41 | -5.27 | -7.14              | -7.16         | 1.61E-02      | 1.51E-02      |
| Rph3al      | 3.06   | 2.44   | 3.05   | 3.54   | 2.49   | 1.72   | -6.38 | 1.32  | -7.77 | -7.09              | -6.85         | 4.50E-03      | 5.96E-03      |
| Rgs16       | 4.21   | 4.46   | 5.23   | 3.66   | 3.35   | 4.17   | -5.33 | -5.27 | 3.27  | -7.08              | -6.15         | 3.29E-03      | 8.52E-03      |
| RP23-392C14 | 2.26   | 3.25   | -7.77  | 0.54   | 0.91   | 0.14   | -7.77 | -7.77 | -7.77 | -7.05              | -8.31         | 4.36E-02      | 1.63E-02      |
| Tmem191c    | 0.49   | 1.98   | 3.57   | -0.07  | 3.57   | 2.25   | -7.77 | 0.55  | -7.77 | -7.02              | -6.95         | 1.38E-02      | 1.48E-02      |
| Tnnt1       | 0.71   | -2.67  | -0.38  | 0.69   | 2.13   | -2.77  | -7.77 | -7.77 | -7.77 | -6.96              | -7.83         | 8.22E-03      | 3.30E-03      |
| Chst2       | 5.99   | 5.69   | 5.03   | 5.12   | 4.33   | 1.84   | 2.00  | -4.01 | -1.98 | -6.91              | -5.14         | 6.37E-03      | 3.34E-02      |
| Aplp1       | 4.29   | 3.71   | 2.27   | 3.31   | 2.59   | 3.46   | 2.61  | -5.27 | -7.77 | -6.91              | -6.59         | 7.84E-03      | 1.09E-02      |
| Ncs1        | 1.39   | 2.15   | 0.77   | -0.22  | 1.24   | -1.04  | -7.77 | -0.83 | -7.77 | -6.90              | -5.46         | 4.92E-03      | 2.41E-02      |
| Fut7        | 4.21   | 1.51   | -4.64  | 3.64   | 4.40   | 1.84   | -7.77 | -4.01 | -7.77 | -6.86              | -9.86         | 4.41E-02      | 3.63E-03      |
| Angptl2     | 4.88   | 4.39   | 4.07   | 0.94   | 3.84   | 3.41   | 0.87  | -4.01 | -4.03 | -6.84              | -5.17         | 2.20E-03      | 1.61E-02      |
| Bivm        | 3.63   | 2.14   | 3.24   | 3.77   | 2.80   | 4.24   | -7.77 | 4.08  | -7.77 | -6.76              | -7.37         | 1.85E-02      | 1.05E-02      |
| Bag3        | 0.28   | 4.47   | 4.71   | 4.50   | 3.45   | 3.59   | -7.77 | 2.77  | -5.27 | -6.67              | -7.24         | 3.32E-02      | 2.05E-02      |
| Bcl7a       | 0.25   | 4.17   | 3.04   | 2.05   | 4.21   | 1.60   | -7.77 | -0.25 | -4.03 | -6.58              | -6.68         | 1.59E-02      | 1.41E-02      |
| Ddx43       | -0.49  | 1.40   | 0.71   | 0.06   | 2.42   | -1.28  | -2.38 | -7.77 | -7.77 | -6.55              | -6.42         | 8.63E-03      | 9.93E-03      |
| Ccr12       | 4.89   | 2.27   | 2.45   | 4.08   | 4.43   | 2.88   | 3.26  | -5.27 | -7.77 | -6.41              | -7.10         | 2.23E-02      | 1.20E-02      |



| Gene        | Sample |        |        |        |        |        |       |       |       | Fold Change (Log2) |               | P-Value       |               |
|-------------|--------|--------|--------|--------|--------|--------|-------|-------|-------|--------------------|---------------|---------------|---------------|
|             | CtrlA1 | CtrlA2 | CtrlA3 | CtrlG1 | CtrlG2 | CtrlG3 | dKO1  | dKO2  | dKO3  | dKO vs. CtrlA      | dKO vs. CtrlG | dKO vs. CtrlA | dKO vs. CtrlG |
| Tcrg-C4     | 2.69   | 2.44   | 3.01   | 0.83   | 1.82   | 1.82   | 2.02  | -5.27 | -7.77 | -6.39              | -5.18         | 7.29E-03      | 2.90E-02      |
| Cebpa       | -0.03  | -3.38  | -0.68  | -0.64  | 1.07   | 0.06   | -7.77 | -7.77 | -7.77 | -6.39              | -7.95         | 5.82E-03      | 9.27E-04      |
| Ppap2a      | 2.80   | 3.49   | -1.18  | 3.37   | 3.71   | 0.42   | 1.68  | -7.77 | -7.77 | -6.37              | -7.18         | 4.38E-02      | 2.19E-02      |
| Plekhh3     | 3.80   | -0.66  | 1.44   | 1.09   | 4.33   | 2.14   | -6.38 | -5.27 | -3.12 | -6.37              | -7.50         | 1.59E-02      | 4.88E-03      |
| Gm14005     | -1.24  | 0.29   | 0.26   | -4.18  | -1.67  | 3.32   | -4.14 | -7.77 | -7.77 | -6.35              | -5.71         | 2.12E-02      | 3.81E-02      |
| E430018J23F | 3.86   | 3.43   | 1.94   | 2.96   | 3.92   | 1.57   | -6.38 | -7.77 | 4.34  | -6.35              | -6.14         | 2.54E-02      | 3.11E-02      |
| Ap4b1       | 5.20   | 5.23   | 3.36   | 5.02   | 3.61   | 4.99   | 1.79  | -1.70 | -5.27 | -6.34              | -6.24         | 1.20E-02      | 1.32E-02      |
| Myo3b       | 3.39   | 5.68   | 3.15   | 3.31   | 5.26   | 2.09   | -3.96 | -5.27 | 2.71  | -6.33              | -5.80         | 2.83E-02      | 4.34E-02      |
| Dst         | 1.89   | 1.28   | 1.17   | 1.73   | 1.33   | 1.56   | 1.15  | -7.77 | -7.77 | -6.25              | -6.35         | 1.24E-02      | 1.11E-02      |
| Chil5       | 1.74   | 2.69   | 3.38   | 2.89   | 2.94   | 2.78   | -0.41 | -2.45 | -7.77 | -6.17              | -6.42         | 4.79E-03      | 3.43E-03      |
| St3gal6     | 2.25   | 2.82   | 4.26   | 2.94   | 4.98   | 4.46   | -6.38 | -5.27 | 2.58  | -6.13              | -7.18         | 2.10E-02      | 7.72E-03      |
| Rasgef1b    | 2.90   | 1.89   | 4.49   | 3.17   | 4.76   | 0.95   | -7.77 | -4.01 | 2.77  | -6.05              | -6.03         | 3.54E-02      | 3.65E-02      |
| Rab3a       | -0.96  | 3.26   | 1.43   | 1.35   | 2.92   | 2.86   | -4.79 | -5.27 | -4.03 | -6.00              | -7.08         | 8.79E-03      | 2.25E-03      |
| Stx17       | 0.42   | 2.10   | 3.80   | 3.07   | 2.44   | -0.28  | -7.77 | -5.27 | 1.41  | -6.00              | -5.63         | 2.56E-02      | 3.64E-02      |
| Ell2        | 0.27   | 3.94   | 2.27   | 3.67   | 3.16   | 1.08   | 1.93  | -7.77 | -5.27 | -5.96              | -6.38         | 3.06E-02      | 1.99E-02      |
| Hip1        | -0.94  | -4.98  | 0.46   | -0.61  | 0.01   | -0.53  | -7.77 | -7.77 | -7.77 | -5.93              | -7.40         | 1.44E-02      | 3.05E-03      |
| Acs1        | 4.54   | 4.23   | 2.25   | 2.31   | 4.74   | 4.27   | -0.66 | 1.70  | -7.77 | -5.92              | -6.05         | 2.87E-02      | 2.55E-02      |
| Gm13357     | 0.75   | 1.10   | -0.35  | -0.80  | 0.89   | -0.58  | -0.57 | -7.77 | -7.77 | -5.89              | -5.23         | 1.48E-02      | 2.99E-02      |
| Gm16638     | 1.59   | 4.58   | 1.63   | 1.95   | 2.71   | 3.57   | -1.23 | 0.00  | -7.77 | -5.68              | -5.74         | 2.07E-02      | 1.90E-02      |
| Actg2       | 4.75   | 3.70   | 3.58   | 3.29   | 5.02   | 4.05   | 3.01  | -4.01 | -4.03 | -5.68              | -5.85         | 1.14E-02      | 9.57E-03      |
| Unc93b1     | 6.10   | 4.40   | 4.97   | 4.17   | 4.56   | 4.07   | -4.14 | 3.02  | -0.52 | -5.62              | -4.79         | 8.47E-03      | 2.11E-02      |
| Carhsp1     | 5.21   | 5.03   | 5.77   | 5.78   | 5.22   | 5.18   | 1.49  | 3.07  | -5.27 | -5.56              | -5.62         | 6.18E-03      | 5.75E-03      |
| Zfp873      | 3.98   | 2.04   | 1.98   | 3.93   | 3.76   | 2.80   | -7.77 | -5.27 | 4.30  | -5.53              | -6.42         | 3.85E-02      | 1.64E-02      |
| Lmna        | 4.40   | 4.18   | 3.81   | 3.07   | 3.56   | 2.99   | 2.23  | -7.77 | 1.49  | -5.51              | -4.60         | 1.38E-02      | 3.73E-02      |
| Mansc1      | 2.72   | 2.74   | 3.47   | 0.67   | 2.14   | 3.24   | -0.71 | -3.41 | -3.42 | -5.49              | -4.53         | 3.20E-03      | 1.31E-02      |
| Ildr1       | 2.96   | 3.46   | 1.87   | 2.35   | 3.75   | 4.57   | -4.79 | -7.77 | 4.63  | -5.43              | -6.21         | 4.86E-02      | 2.38E-02      |
| Eea1        | 5.73   | 5.90   | 5.22   | 5.56   | 4.41   | 3.87   | 3.14  | -0.09 | -2.36 | -5.42              | -4.40         | 3.61E-03      | 1.32E-02      |
| Pctp        | 3.64   | 3.66   | 4.31   | 2.78   | 5.35   | 2.16   | -4.79 | 3.06  | -2.88 | -5.38              | -5.03         | 2.35E-02      | 3.40E-02      |
| 1700028N14  | -1.84  | 1.18   | 0.22   | -0.78  | -1.53  | 0.64   | -7.77 | -5.27 | -3.42 | -5.37              | -4.91         | 1.57E-02      | 2.60E-02      |
| Adap1       | 5.63   | 5.71   | 5.65   | 3.41   | 4.40   | 5.38   | 0.65  | -4.01 | 4.39  | -5.34              | -4.07         | 7.55E-03      | 3.30E-02      |
| Trav12d-1   | -2.79  | 2.02   | 1.29   | 0.61   | 0.96   | 1.44   | 0.25  | -7.77 | -7.77 | -5.34              | -6.11         | 4.82E-02      | 2.29E-02      |
| 1700021K19  | 3.38   | 4.89   | 5.56   | 4.11   | 3.91   | 4.71   | -5.33 | 4.55  | -1.32 | -5.30              | -4.89         | 2.60E-02      | 3.83E-02      |
| Casp4       | 4.90   | 2.68   | 3.96   | 3.49   | 3.44   | 4.66   | -7.77 | 2.81  | 0.34  | -5.29              | -5.35         | 3.40E-02      | 3.22E-02      |
| RP24-546N2  | 2.55   | -3.38  | -0.06  | 2.94   | -0.37  | 2.57   | -6.38 | -5.27 | -5.27 | -5.27              | -7.29         | 4.51E-02      | 5.82E-03      |
| Prg4        | 4.89   | 5.53   | 5.19   | 4.86   | 2.45   | 5.19   | 3.35  | -0.64 | -2.76 | -5.26              | -4.14         | 1.39E-02      | 4.58E-02      |
| Farp1       | 3.13   | 2.83   | 3.26   | 3.92   | 4.26   | 1.94   | -4.64 | -2.51 | 0.54  | -5.26              | -5.62         | 1.02E-02      | 6.49E-03      |
| Snx16       | 1.66   | 3.18   | 2.64   | 4.57   | 2.12   | 2.88   | -1.13 | -7.77 | 0.79  | -5.25              | -5.87         | 2.84E-02      | 1.41E-02      |
| Sntb2       | 2.49   | 4.14   | 3.25   | 1.65   | 2.75   | 2.20   | 0.58  | -1.97 | -4.03 | -5.16              | -4.03         | 4.90E-03      | 2.49E-02      |
| Kctd17      | 3.85   | 3.34   | 3.83   | 3.39   | 4.03   | 4.22   | -7.77 | 1.94  | 1.30  | -5.14              | -5.37         | 2.04E-02      | 1.58E-02      |
| Ccr6        | 6.40   | 6.56   | 6.98   | 5.42   | 4.38   | 5.79   | 2.15  | 5.20  | -2.88 | -5.14              | -3.66         | 6.31E-03      | 3.81E-02      |
| Fah         | 3.57   | 4.02   | 4.13   | 4.45   | 5.29   | 3.40   | 3.20  | -0.97 | -5.27 | -4.95              | -5.45         | 2.20E-02      | 1.28E-02      |
| Golm1       | 4.42   | 4.12   | 5.73   | 5.64   | 5.49   | 5.16   | 3.31  | 1.39  | -5.27 | -4.94              | -5.64         | 1.92E-02      | 9.18E-03      |
| Il10ra      | 5.75   | 6.36   | 7.32   | 6.22   | 6.90   | 5.27   | 5.20  | 2.23  | -2.66 | -4.93              | -4.60         | 2.66E-02      | 3.63E-02      |
| Mthfr       | 3.82   | 4.54   | 4.04   | 5.73   | 4.92   | 3.39   | 3.32  | -5.27 | -0.16 | -4.90              | -5.44         | 3.54E-02      | 2.09E-02      |
| Cyflp1      | 6.03   | 5.92   | 6.64   | 6.38   | 7.08   | 6.44   | -3.52 | 5.51  | 1.74  | -4.88              | -5.34         | 1.20E-02      | 7.13E-03      |
| Tmem41a     | 4.75   | 3.24   | 3.02   | 3.74   | 4.39   | 2.07   | 3.14  | -4.01 | -2.76 | -4.86              | -4.68         | 2.56E-02      | 3.19E-02      |
| Prkar2a     | 3.98   | 4.26   | 3.64   | 4.28   | 4.58   | 4.43   | -7.77 | 4.23  | 0.82  | -4.82              | -5.29         | 3.40E-02      | 2.12E-02      |
| Gm26732     | 4.16   | 3.06   | 4.58   | 4.58   | 5.47   | 4.40   | 3.03  | -1.70 | -4.03 | -4.82              | -5.76         | 1.80E-02      | 6.08E-03      |
| Evi2a       | 2.43   | 0.97   | 3.84   | 4.52   | 4.22   | 4.16   | -7.77 | 1.02  | 0.13  | -4.55              | -6.48         | 4.77E-02      | 5.78E-03      |
| Synpo       | 4.66   | 4.15   | 1.75   | 2.88   | 4.58   | 3.34   | 1.66  | 0.72  | -5.27 | -4.49              | -4.61         | 4.60E-02      | 4.06E-02      |
| Ncmmap      | 5.34   | 5.49   | 5.80   | 5.51   | 4.40   | 5.24   | 0.81  | 2.33  | 0.11  | -4.45              | -3.93         | 1.29E-03      | 3.12E-03      |
| Dnah7a      | 4.71   | 5.53   | 3.62   | 5.05   | 5.13   | 3.16   | 2.54  | -4.01 | 2.26  | -4.43              | -4.25         | 3.93E-02      | 4.68E-02      |
| Tmem8       | 4.84   | 4.42   | 5.23   | 4.30   | 3.92   | 5.02   | 1.15  | 1.95  | -1.91 | -4.42              | -3.99         | 3.79E-03      | 7.35E-03      |
| Ly6a        | 7.14   | 7.61   | 7.86   | 8.15   | 8.39   | 8.13   | 3.16  | 3.16  | 3.34  | -4.32              | -5.01         | 3.90E-05      | 9.99E-06      |
| Sgsh        | 4.77   | 3.64   | 4.96   | 4.10   | 3.80   | 4.21   | -4.79 | 3.09  | 2.54  | -4.09              | -3.69         | 2.84E-02      | 4.59E-02      |
| Tbc1d30     | 4.49   | 6.05   | 5.79   | 5.61   | 4.58   | 5.21   | -0.60 | 2.28  | 2.56  | -4.04              | -3.68         | 1.02E-02      | 1.72E-02      |
| S100a4      | 4.47   | 4.57   | 4.17   | 3.51   | 4.46   | 3.84   | 0.34  | 0.31  | 0.60  | -3.99              | -3.54         | 1.66E-03      | 4.01E-03      |
| Atp9a       | 5.91   | 6.21   | 6.80   | 5.81   | 5.82   | 5.68   | 4.22  | -2.90 | 6.15  | -3.90              | -3.36         | 2.30E-02      | 4.57E-02      |
| Fitm2       | 1.94   | 3.97   | 3.17   | 3.69   | 4.51   | 3.95   | 1.20  | 1.62  | -5.27 | -3.90              | -4.88         | 4.32E-02      | 1.23E-02      |
| Cep85l      | 4.51   | 2.55   | 3.36   | 2.70   | 3.73   | 4.00   | 1.94  | -2.90 | -0.17 | -3.82              | -3.89         | 2.42E-02      | 2.21E-02      |
| Mettl21a    | 4.49   | 4.66   | 4.71   | 3.92   | 3.84   | 5.08   | 0.14  | 3.57  | -1.13 | -3.75              | -3.38         | 8.83E-03      | 1.61E-02      |
| Stk35       | 1.60   | 1.84   | 3.10   | 0.96   | 3.63   | 3.55   | 0.14  | -2.35 | -2.46 | -3.74              | -4.31         | 4.34E-02      | 2.02E-02      |
| Maf         | 6.27   | 6.37   | 6.96   | 5.48   | 5.67   | 5.11   | 3.96  | 0.81  | 3.88  | -3.69              | -2.59         | 8.28E-04      | 9.76E-03      |
| Btbd10      | 4.26   | 5.57   | 3.33   | 4.89   | 3.82   | 4.07   | 0.81  | -1.75 | 3.27  | -3.67              | -3.48         | 3.15E-02      | 3.99E-02      |
| Slc25a1     | 4.57   | 5.16   | 5.12   | 5.35   | 5.47   | 6.09   | 4.33  | -2.68 | 2.71  | -3.57              | -4.23         | 2.19E-02      | 8.40E-03      |
| Adck4       | 4.22   | 3.48   | 4.41   | 3.98   | 5.16   | 3.00   | 2.29  | -3.12 | 2.49  | -3.49              | -3.58         | 4.31E-02      | 3.89E-02      |
| Sdcbp2      | 6.50   | 6.62   | 6.15   | 5.56   | 5.60   | 6.23   | 4.71  | 0.52  | 3.82  | -3.47              | -2.84         | 1.77E-03      | 7.02E-03      |
| Batf        | 6.69   | 5.90   | 6.54   | 6.06   | 6.22   | 6.32   | 4.82  | 1.27  | 2.91  | -3.41              | -3.25         | 1.21E-03      | 1.73E-03      |
| Tmx4        | 5.83   | 6.66   | 5.47   | 5.49   | 4.78   | 6.09   | 4.89  | 0.18  | 2.99  | -3.38              | -2.80         | 1.13E-02      | 3.03E-02      |
| Ccr8        | 5.15   | 5.43   | 6.29   | 5.13   | 4.44   | 4.65   | 0.65  | 2.74  | 3.30  | -3.37              | -2.47         | 3.73E-03      | 2.37E-02      |
| Fbxw8       | 4.61   | 5.22   | 5.59   | 5.30   | 6.05   | 4.52   | 2.92  | -0.51 | 3.17  | -3.33              | -3.49         | 1.72E-02      | 1.32E-02      |
| Nrp1        | 9.16   | 9.61   | 9.78   | 8.74   | 8.58   | 8.58   | 5.54  | 6.49  | 6.62  | -3.30              | -2.40         | 1.57E-06      | 3.87E-05      |
| Mast4       | 5.47   | 5.57   | 5.17   | 4.87   | 4.32   | 4.28   | 3.88  | 3.36  | 0.11  | -2.97              | -2.04         | 4.68E-03      | 3.86E-02      |
| Pear1       | 5.30   | 5.66   | 6.63   | 6.43   | 4.94   | 6.81   | 2.49  | 4.41  | 1.70  | -2.97              | -3.13         | 3.16E-02      | 2.45E-02      |
| Pde2a       | 7.66   | 8.10   | 7.97   | 6.72   | 7.64   | 7.83   | 4.34  | 6.51  | 3.99  | -2.95              | -2.43         | 5.33E-04      | 2.41E-03      |

| Gene     | Sample |        |        |        |        |        |      |      |       | Fold Change (Log2) |               | P-Value       |               |
|----------|--------|--------|--------|--------|--------|--------|------|------|-------|--------------------|---------------|---------------|---------------|
|          | CtrlA1 | CtrlA2 | CtrlA3 | CtrlG1 | CtrlG2 | CtrlG3 | dKO1 | dKO2 | dKO3  | dKO vs. CtrlA      | dKO vs. CtrlG | dKO vs. CtrlA | dKO vs. CtrlG |
| Ass1     | 6.86   | 6.93   | 6.82   | 6.33   | 6.76   | 6.66   | 3.22 | 4.36 | 4.19  | -2.94              | -2.65         | 2.32E-05      | 6.12E-05      |
| Pck2     | 5.20   | 6.06   | 5.61   | 5.60   | 5.72   | 4.95   | 2.84 | 3.10 | 2.26  | -2.91              | -2.70         | 1.73E-03      | 2.98E-03      |
| Ly6c1    | 6.66   | 7.05   | 6.77   | 7.17   | 7.55   | 7.65   | 4.73 | 3.40 | 3.96  | -2.83              | -3.45         | 8.35E-05      | 1.26E-05      |
| Ampd3    | 5.43   | 4.52   | 5.73   | 5.92   | 5.48   | 4.86   | 2.75 | 0.54 | 3.94  | -2.82              | -3.04         | 1.64E-02      | 1.06E-02      |
| Il12rb1  | 5.05   | 5.68   | 6.50   | 5.88   | 6.31   | 4.89   | 4.49 | 4.51 | -0.09 | -2.79              | -2.75         | 3.55E-02      | 3.78E-02      |
| Cd83     | 8.27   | 8.64   | 8.67   | 7.70   | 7.51   | 7.56   | 5.95 | 5.17 | 6.20  | -2.77              | -1.82         | 1.38E-06      | 9.18E-05      |
| Gpr183   | 7.68   | 7.17   | 7.89   | 7.09   | 8.17   | 7.69   | 5.01 | 4.82 | 4.60  | -2.76              | -2.86         | 3.33E-04      | 2.47E-04      |
| Slc22a5  | 6.39   | 6.14   | 5.53   | 6.19   | 5.77   | 5.90   | 0.97 | 3.63 | 5.10  | -2.74              | -2.67         | 6.14E-03      | 7.19E-03      |
| Arhgap5  | 4.94   | 5.90   | 5.99   | 5.21   | 5.51   | 4.71   | 1.35 | 4.28 | 3.05  | -2.70              | -2.22         | 6.86E-03      | 2.10E-02      |
| Chsy1    | 4.35   | 3.07   | 4.40   | 3.79   | 3.58   | 3.74   | 0.48 | 0.33 | 2.93  | -2.65              | -2.45         | 2.48E-02      | 3.67E-02      |
| Itgb1    | 8.71   | 9.19   | 9.17   | 8.93   | 9.14   | 8.81   | 6.49 | 6.41 | 6.29  | -2.65              | -2.58         | 8.60E-07      | 1.13E-06      |
| Ptger2   | 4.92   | 5.65   | 6.39   | 5.67   | 5.63   | 6.49   | 3.92 | 2.27 | 3.06  | -2.61              | -2.86         | 8.86E-03      | 4.85E-03      |
| Ank      | 6.28   | 5.69   | 6.10   | 5.79   | 5.64   | 6.50   | 4.22 | 3.63 | 2.48  | -2.58              | -2.53         | 1.53E-03      | 1.74E-03      |
| Atp10a   | 6.44   | 5.21   | 4.39   | 5.09   | 5.49   | 5.14   | 3.25 | 1.52 | 3.57  | -2.57              | -2.49         | 2.07E-02      | 2.41E-02      |
| Tmem154  | 7.30   | 7.58   | 8.03   | 6.75   | 7.07   | 7.53   | 4.48 | 5.38 | 5.35  | -2.56              | -2.03         | 8.50E-05      | 6.48E-04      |
| Ighmbp2  | 4.20   | 5.33   | 4.82   | 4.27   | 4.73   | 4.23   | 1.66 | 1.48 | 3.66  | -2.55              | -2.16         | 9.97E-03      | 2.51E-02      |
| Fbxl17   | 6.48   | 6.49   | 6.32   | 5.39   | 6.37   | 6.16   | 4.86 | 5.70 | 1.12  | -2.53              | -2.09         | 1.12E-02      | 3.16E-02      |
| Ahna1    | 8.08   | 7.70   | 7.54   | 7.13   | 7.21   | 7.52   | 5.72 | 4.64 | 5.58  | -2.47              | -1.98         | 1.93E-05      | 1.53E-04      |
| Furin    | 7.24   | 6.56   | 6.35   | 6.22   | 6.42   | 6.87   | 4.81 | 4.89 | 3.11  | -2.44              | -2.23         | 1.03E-03      | 2.04E-03      |
| Snx14    | 5.80   | 6.57   | 6.17   | 5.51   | 4.98   | 5.15   | 3.91 | 4.02 | 3.39  | -2.43              | -1.43         | 3.54E-04      | 1.54E-02      |
| Pard6g   | 4.57   | 6.42   | 5.37   | 5.48   | 6.19   | 6.09   | 4.35 | 4.67 | 0.24  | -2.42              | -2.84         | 4.82E-02      | 2.22E-02      |
| Plekha1  | 5.78   | 5.31   | 5.80   | 5.85   | 4.78   | 5.63   | 4.48 | 4.71 | 0.46  | -2.41              | -2.18         | 2.22E-02      | 3.57E-02      |
| Il18r1   | 5.24   | 3.75   | 4.78   | 5.10   | 4.48   | 3.70   | 2.15 | 1.38 | 2.92  | -2.40              | -2.29         | 2.86E-02      | 3.62E-02      |
| Glrx     | 5.93   | 6.13   | 6.66   | 5.69   | 6.37   | 5.67   | 4.67 | 2.41 | 4.87  | -2.29              | -1.97         | 3.40E-03      | 9.16E-03      |
| Cxcr3    | 5.79   | 5.95   | 7.44   | 6.21   | 6.13   | 6.16   | 2.58 | 5.16 | 4.46  | -2.28              | -2.06         | 1.17E-02      | 2.08E-02      |
| Fuca2    | 5.62   | 5.30   | 5.14   | 5.46   | 5.57   | 5.92   | 3.60 | 3.38 | 2.29  | -2.26              | -2.56         | 2.08E-03      | 7.92E-04      |
| S100a6   | 6.40   | 6.63   | 5.93   | 4.97   | 6.21   | 5.20   | 3.53 | 4.39 | 4.27  | -2.26              | -1.41         | 1.34E-03      | 2.74E-02      |
| Ube2l6   | 5.36   | 6.03   | 6.07   | 5.91   | 6.64   | 6.05   | 3.56 | 4.69 | 2.46  | -2.25              | -2.63         | 4.66E-03      | 1.51E-03      |
| Tmem243  | 6.35   | 6.55   | 6.41   | 5.78   | 5.99   | 6.21   | 4.47 | 4.68 | 3.58  | -2.19              | -1.75         | 1.26E-04      | 8.85E-04      |
| Lgals1   | 7.11   | 7.02   | 7.48   | 6.79   | 7.47   | 7.12   | 4.97 | 4.91 | 5.21  | -2.17              | -2.11         | 6.39E-05      | 8.37E-05      |
| Capg     | 8.97   | 9.27   | 9.29   | 8.60   | 8.67   | 9.02   | 6.92 | 7.00 | 7.17  | -2.15              | -1.73         | 5.90E-07      | 5.88E-06      |
| Fam101b  | 6.09   | 4.95   | 6.07   | 5.77   | 6.36   | 5.99   | 4.56 | 2.77 | 3.45  | -2.11              | -2.49         | 8.32E-03      | 2.75E-03      |
| Cpd      | 4.48   | 5.07   | 4.34   | 5.55   | 4.69   | 5.45   | 4.19 | 0.20 | 3.44  | -2.09              | -2.65         | 4.73E-02      | 1.40E-02      |
| Tspan31  | 5.78   | 5.42   | 6.18   | 5.35   | 6.08   | 5.35   | 4.62 | 1.97 | 4.67  | -2.07              | -1.90         | 1.07E-02      | 1.75E-02      |
| Bmp7     | 4.49   | 5.05   | 5.39   | 4.38   | 4.93   | 4.34   | 3.36 | 2.90 | 2.62  | -2.04              | -1.61         | 6.40E-03      | 2.48E-02      |
| Rilpl2   | 5.64   | 6.32   | 6.54   | 5.66   | 5.90   | 5.95   | 2.89 | 4.35 | 5.17  | -2.02              | -1.68         | 3.38E-03      | 1.12E-02      |
| Lax1     | 5.77   | 6.29   | 6.67   | 6.78   | 6.42   | 5.91   | 5.39 | 4.46 | 2.96  | -2.00              | -2.12         | 6.29E-03      | 4.22E-03      |
| Osbp15   | 5.28   | 5.46   | 5.00   | 5.13   | 6.01   | 5.93   | 5.03 | 1.09 | 3.84  | -1.99              | -2.44         | 3.27E-02      | 1.09E-02      |
| Iqgap2   | 5.25   | 6.05   | 4.40   | 6.34   | 5.92   | 6.29   | 4.86 | 3.67 | 1.36  | -1.98              | -2.90         | 4.12E-02      | 4.88E-03      |
| Icos     | 6.43   | 6.20   | 6.57   | 5.99   | 5.83   | 5.88   | 4.47 | 3.99 | 4.85  | -1.96              | -1.47         | 1.36E-04      | 1.58E-03      |
| Pdcd1    | 8.13   | 7.31   | 7.50   | 7.77   | 7.03   | 7.30   | 5.72 | 5.68 | 5.61  | -1.96              | -1.68         | 2.26E-04      | 8.21E-04      |
| Psen2    | 7.11   | 7.47   | 7.54   | 6.83   | 6.80   | 7.05   | 5.12 | 5.79 | 5.33  | -1.96              | -1.47         | 2.21E-05      | 3.16E-04      |
| Arhgap26 | 5.79   | 6.55   | 4.95   | 6.08   | 5.50   | 5.29   | 4.31 | 4.91 | 2.27  | -1.96              | -1.79         | 2.44E-02      | 3.76E-02      |
| Cd44     | 7.24   | 7.47   | 7.99   | 7.12   | 7.70   | 7.55   | 5.10 | 5.02 | 6.78  | -1.94              | -1.83         | 1.13E-03      | 1.75E-03      |
| Ccnc     | 5.99   | 5.04   | 5.56   | 5.03   | 4.81   | 5.29   | 5.10 | 2.93 | 2.87  | -1.91              | -1.44         | 1.01E-02      | 4.45E-02      |
| Smpd3a   | 8.40   | 8.81   | 8.88   | 8.54   | 8.63   | 8.21   | 6.50 | 6.81 | 7.14  | -1.89              | -1.65         | 1.06E-05      | 4.10E-05      |
| Fam210b  | 5.45   | 5.94   | 5.32   | 4.92   | 5.91   | 5.20   | 3.00 | 4.64 | 3.46  | -1.86              | -1.64         | 7.34E-03      | 1.55E-02      |
| Nt5e     | 8.82   | 8.54   | 8.86   | 8.51   | 8.61   | 8.15   | 6.69 | 6.98 | 6.94  | -1.86              | -1.56         | 3.06E-06      | 1.83E-05      |
| Ldlrad4  | 5.59   | 5.48   | 6.43   | 5.84   | 6.08   | 6.75   | 5.16 | 2.67 | 4.25  | -1.84              | -2.23         | 1.62E-02      | 4.92E-03      |
| Endod1   | 5.97   | 7.33   | 6.16   | 5.84   | 6.82   | 6.92   | 5.23 | 4.94 | 3.91  | -1.84              | -1.85         | 1.27E-02      | 1.20E-02      |
| Sh3bgr1  | 7.53   | 7.98   | 7.88   | 7.14   | 7.11   | 6.92   | 5.61 | 5.81 | 6.53  | -1.82              | -1.07         | 3.28E-05      | 2.98E-03      |
| Ermp1    | 6.85   | 6.47   | 6.86   | 6.93   | 6.33   | 5.97   | 5.67 | 3.81 | 5.42  | -1.77              | -1.47         | 3.12E-03      | 1.09E-02      |
| Abcb1a   | 6.21   | 6.01   | 5.42   | 5.47   | 5.75   | 4.82   | 3.56 | 4.03 | 4.78  | -1.74              | -1.23         | 4.39E-03      | 3.33E-02      |
| Stard3nl | 5.64   | 5.72   | 4.95   | 5.09   | 5.67   | 5.72   | 5.03 | 4.51 | 1.61  | -1.74              | -1.80         | 3.60E-02      | 3.04E-02      |
| Cst7     | 7.15   | 6.72   | 7.79   | 6.23   | 6.68   | 6.58   | 5.46 | 5.72 | 5.23  | -1.73              | -1.03         | 7.81E-04      | 2.51E-02      |
| Fam117b  | 6.58   | 7.10   | 6.80   | 6.01   | 6.66   | 6.32   | 5.84 | 5.31 | 4.21  | -1.73              | -1.23         | 1.19E-03      | 1.25E-02      |
| Nabp2    | 5.67   | 6.13   | 5.07   | 4.66   | 5.53   | 5.21   | 4.06 | 3.77 | 3.94  | -1.72              | -1.23         | 5.96E-03      | 3.83E-02      |
| H2-Q6    | 8.70   | 8.62   | 8.56   | 8.22   | 8.07   | 8.11   | 6.45 | 7.52 | 6.79  | -1.69              | -1.20         | 1.17E-05      | 3.03E-04      |
| Abhd6    | 4.87   | 5.83   | 5.39   | 4.62   | 5.40   | 5.71   | 3.01 | 3.95 | 4.10  | -1.69              | -1.55         | 1.41E-02      | 2.22E-02      |
| Ube2o    | 5.35   | 4.51   | 4.30   | 5.31   | 4.95   | 5.45   | 4.18 | 3.53 | 1.39  | -1.68              | -2.20         | 4.41E-02      | 1.06E-02      |
| Igfr1    | 5.58   | 5.13   | 5.47   | 5.25   | 5.27   | 4.98   | 3.72 | 4.16 | 3.26  | -1.66              | -1.45         | 3.03E-03      | 7.58E-03      |
| Tyk2     | 6.44   | 7.52   | 6.69   | 6.66   | 6.56   | 6.78   | 5.02 | 5.21 | 5.53  | -1.66              | -1.41         | 1.23E-03      | 4.03E-03      |
| S100a11  | 6.24   | 6.35   | 6.34   | 5.60   | 6.24   | 5.65   | 4.54 | 4.42 | 5.07  | -1.64              | -1.17         | 5.34E-04      | 6.60E-03      |
| Nbn      | 4.23   | 5.01   | 5.27   | 4.83   | 4.91   | 4.63   | 3.54 | 4.06 | 2.07  | -1.62              | -1.57         | 2.59E-02      | 3.06E-02      |
| Tri1     | 5.41   | 4.60   | 5.84   | 5.43   | 4.71   | 5.92   | 3.94 | 3.03 | 3.99  | -1.62              | -1.69         | 2.92E-02      | 2.33E-02      |
| Clip1    | 6.66   | 6.59   | 6.45   | 7.28   | 6.39   | 5.81   | 5.32 | 5.93 | 3.59  | -1.61              | -1.54         | 1.77E-02      | 2.24E-02      |
| Slc48a1  | 6.29   | 6.75   | 6.55   | 6.29   | 6.82   | 6.81   | 5.16 | 4.61 | 5.08  | -1.60              | -1.70         | 5.83E-04      | 3.39E-04      |
| Tesc     | 5.25   | 5.36   | 5.72   | 5.56   | 6.37   | 5.85   | 4.39 | 3.87 | 3.34  | -1.59              | -2.09         | 8.05E-03      | 1.15E-03      |
| Ptpn7    | 8.14   | 8.16   | 8.34   | 8.29   | 7.53   | 8.46   | 7.01 | 6.31 | 6.62  | -1.57              | -1.44         | 3.92E-04      | 8.17E-04      |
| Cd86     | 5.92   | 6.61   | 6.14   | 6.04   | 5.89   | 5.82   | 4.54 | 4.88 | 4.58  | -1.57              | -1.24         | 7.79E-04      | 4.38E-03      |
| Mettl2   | 5.06   | 4.87   | 5.39   | 4.43   | 4.45   | 5.42   | 3.59 | 3.05 | 4.01  | -1.56              | -1.21         | 1.36E-02      | 4.86E-02      |
| Mtif2    | 5.04   | 5.45   | 5.69   | 5.08   | 4.90   | 5.20   | 3.84 | 3.11 | 4.65  | -1.55              | -1.20         | 7.51E-03      | 3.08E-02      |
| Anxa2    | 6.38   | 6.31   | 6.60   | 5.33   | 6.81   | 6.37   | 4.64 | 4.91 | 5.09  | -1.54              | -1.31         | 5.79E-03      | 1.60E-02      |
| Plekhh2  | 7.35   | 7.77   | 7.81   | 6.84   | 7.74   | 7.46   | 6.00 | 6.11 | 6.24  | -1.54              | -1.24         | 3.63E-04      | 2.00E-03      |
| Lats2    | 6.95   | 7.11   | 7.47   | 7.14   | 6.76   | 7.97   | 6.49 | 6.31 | 4.14  | -1.54              | -1.63         | 1.96E-02      | 1.39E-02      |

| Gene       | Sample |        |        |        |        |        |      |      |      | Fold Change (Log2) |               | P-Value       |               |
|------------|--------|--------|--------|--------|--------|--------|------|------|------|--------------------|---------------|---------------|---------------|
|            | CtrlA1 | CtrlA2 | CtrlA3 | CtrlG1 | CtrlG2 | CtrlG3 | dKO1 | dKO2 | dKO3 | dKO vs. CtrlA      | dKO vs. CtrlG | dKO vs. CtrlA | dKO vs. CtrlG |
| Cd82       | 9.22   | 9.29   | 9.75   | 9.06   | 9.32   | 9.33   | 7.93 | 7.81 | 7.99 | -1.51              | -1.33         | 9.31E-06      | 3.24E-05      |
| Blvra      | 6.09   | 4.94   | 5.82   | 5.57   | 5.78   | 5.28   | 4.24 | 4.65 | 3.33 | -1.50              | -1.47         | 1.51E-02      | 1.72E-02      |
| Fam49a     | 6.57   | 6.75   | 5.44   | 6.71   | 7.25   | 7.00   | 5.59 | 2.97 | 5.85 | -1.50              | -2.23         | 4.97E-02      | 5.59E-03      |
| Acot7      | 6.07   | 6.45   | 6.98   | 6.50   | 5.54   | 6.71   | 5.62 | 4.03 | 5.46 | -1.49              | -1.21         | 1.46E-02      | 4.12E-02      |
| Atp2b1     | 7.54   | 7.97   | 7.87   | 7.70   | 6.90   | 7.76   | 6.67 | 6.25 | 6.04 | -1.49              | -1.12         | 5.72E-04      | 4.74E-03      |
| Ccdc50     | 5.74   | 6.03   | 6.24   | 6.31   | 5.35   | 6.61   | 4.80 | 3.87 | 5.01 | -1.46              | -1.51         | 1.39E-02      | 1.09E-02      |
| Ezh2       | 5.84   | 5.17   | 5.31   | 5.26   | 5.53   | 5.75   | 4.08 | 3.22 | 4.66 | -1.45              | -1.54         | 1.07E-02      | 7.42E-03      |
| Rbl1       | 5.59   | 6.67   | 6.83   | 6.96   | 6.66   | 6.43   | 4.60 | 5.72 | 4.55 | -1.41              | -1.71         | 1.32E-02      | 3.80E-03      |
| Cldn25     | 6.49   | 7.05   | 7.49   | 6.58   | 6.97   | 6.72   | 5.23 | 5.71 | 5.90 | -1.40              | -1.14         | 1.80E-03      | 7.23E-03      |
| Unc119     | 4.56   | 5.73   | 5.21   | 5.26   | 5.59   | 5.60   | 3.43 | 3.17 | 4.82 | -1.39              | -1.69         | 3.06E-02      | 1.06E-02      |
| Gpr68      | 5.54   | 6.32   | 6.62   | 6.42   | 6.56   | 6.05   | 4.83 | 4.97 | 4.54 | -1.39              | -1.57         | 5.97E-03      | 2.54E-03      |
| Jade1      | 6.19   | 5.47   | 5.34   | 5.98   | 5.73   | 5.65   | 3.57 | 3.96 | 5.25 | -1.38              | -1.52         | 1.53E-02      | 8.63E-03      |
| Gbp5       | 6.88   | 6.46   | 7.42   | 6.60   | 6.80   | 6.68   | 4.97 | 5.82 | 5.78 | -1.37              | -1.16         | 2.49E-03      | 7.68E-03      |
| B3gnt1     | 4.87   | 4.13   | 5.19   | 4.88   | 5.33   | 5.38   | 2.46 | 3.24 | 4.26 | -1.37              | -1.87         | 4.98E-02      | 1.01E-02      |
| Rfc1       | 6.24   | 7.01   | 5.78   | 6.44   | 5.98   | 5.88   | 4.81 | 5.82 | 4.35 | -1.36              | -1.09         | 1.57E-02      | 4.63E-02      |
| Serpinh6b  | 5.10   | 5.84   | 4.81   | 5.50   | 5.48   | 5.35   | 4.60 | 2.65 | 4.58 | -1.36              | -1.53         | 3.59E-02      | 1.95E-02      |
| Tmem109    | 6.41   | 5.92   | 6.04   | 5.92   | 6.80   | 6.15   | 5.25 | 5.07 | 3.99 | -1.35              | -1.54         | 1.04E-02      | 4.29E-03      |
| Igf1bp4    | 7.70   | 7.41   | 7.29   | 7.56   | 8.06   | 8.56   | 5.64 | 6.83 | 5.84 | -1.34              | -1.94         | 6.63E-03      | 3.98E-04      |
| Sid1       | 7.75   | 7.48   | 7.49   | 7.75   | 7.31   | 7.13   | 5.91 | 6.42 | 6.36 | -1.33              | -1.16         | 2.44E-04      | 7.90E-04      |
| Cd4        | 9.68   | 9.75   | 9.95   | 10.00  | 9.41   | 9.80   | 8.57 | 8.36 | 8.47 | -1.33              | -1.26         | 2.53E-05      | 4.16E-05      |
| Syng2      | 6.52   | 6.66   | 7.15   | 6.65   | 6.75   | 6.84   | 5.98 | 5.44 | 5.09 | -1.28              | -1.25         | 1.43E-03      | 1.72E-03      |
| Trat1      | 6.48   | 6.56   | 6.76   | 6.73   | 6.92   | 6.46   | 4.94 | 5.41 | 5.61 | -1.27              | -1.39         | 1.00E-03      | 4.91E-04      |
| Il6ra      | 7.18   | 6.90   | 6.91   | 6.87   | 6.91   | 7.00   | 5.75 | 6.08 | 5.31 | -1.27              | -1.21         | 3.57E-04      | 5.41E-04      |
| Tmub1      | 6.22   | 5.01   | 6.45   | 5.71   | 5.92   | 6.19   | 4.93 | 4.14 | 4.77 | -1.26              | -1.34         | 2.99E-02      | 2.22E-02      |
| Sypl       | 7.05   | 6.94   | 7.24   | 6.75   | 7.14   | 6.59   | 5.94 | 5.86 | 5.69 | -1.24              | -1.01         | 3.74E-04      | 2.00E-03      |
| Ezh1       | 6.85   | 7.53   | 6.86   | 6.78   | 7.22   | 6.71   | 5.50 | 5.88 | 6.18 | -1.24              | -1.05         | 2.23E-03      | 6.61E-03      |
| Zfand5     | 6.51   | 6.27   | 6.25   | 6.19   | 7.13   | 6.52   | 5.80 | 5.09 | 4.47 | -1.23              | -1.52         | 1.20E-02      | 2.97E-03      |
| Sfxn1      | 5.98   | 6.40   | 5.88   | 6.17   | 6.64   | 5.70   | 5.68 | 3.45 | 5.63 | -1.21              | -1.30         | 4.85E-02      | 3.47E-02      |
| Tnfrsf4    | 9.57   | 9.53   | 9.64   | 9.85   | 9.05   | 9.53   | 8.36 | 8.25 | 8.56 | -1.19              | -1.07         | 1.86E-04      | 4.49E-04      |
| Tk2        | 5.68   | 6.91   | 6.79   | 6.49   | 7.13   | 6.02   | 5.07 | 5.65 | 5.22 | -1.17              | -1.25         | 3.17E-02      | 2.23E-02      |
| Arl5a      | 6.94   | 7.63   | 7.40   | 6.86   | 7.87   | 7.78   | 6.93 | 5.16 | 6.51 | -1.16              | -1.33         | 2.82E-02      | 1.34E-02      |
| Cdc25b     | 5.95   | 5.94   | 6.04   | 6.37   | 6.11   | 5.41   | 4.80 | 4.18 | 5.50 | -1.16              | -1.16         | 1.65E-02      | 1.68E-02      |
| Gltscr1    | 5.65   | 7.03   | 6.85   | 6.77   | 6.37   | 6.38   | 5.21 | 5.20 | 5.74 | -1.16              | -1.12         | 2.05E-02      | 2.37E-02      |
| Bcap29     | 6.59   | 7.01   | 7.03   | 6.50   | 6.43   | 7.34   | 5.24 | 5.78 | 6.15 | -1.16              | -1.02         | 7.26E-03      | 1.52E-02      |
| Topors     | 6.10   | 6.62   | 7.22   | 6.63   | 6.60   | 6.77   | 6.12 | 5.41 | 5.03 | -1.14              | -1.16         | 1.10E-02      | 1.02E-02      |
| Ncf4       | 5.99   | 5.83   | 6.42   | 6.10   | 6.33   | 5.95   | 4.05 | 5.09 | 5.69 | -1.11              | -1.17         | 1.87E-02      | 1.40E-02      |
| Rora       | 5.15   | 6.06   | 5.38   | 6.11   | 6.20   | 5.69   | 4.77 | 4.32 | 4.27 | -1.11              | -1.56         | 2.19E-02      | 2.43E-03      |
| Samhd1     | 9.34   | 9.39   | 9.28   | 9.41   | 9.26   | 9.32   | 8.22 | 8.17 | 8.31 | -1.11              | -1.09         | 6.10E-07      | 6.70E-07      |
| Egln1      | 6.75   | 6.76   | 6.81   | 7.20   | 6.72   | 7.22   | 4.54 | 6.45 | 5.98 | -1.09              | -1.35         | 2.00E-02      | 5.53E-03      |
| Ap1g2      | 6.30   | 7.07   | 5.61   | 7.14   | 6.69   | 6.73   | 5.86 | 4.62 | 5.38 | -1.08              | -1.58         | 4.19E-02      | 5.03E-03      |
| Cd28       | 6.56   | 6.14   | 6.56   | 6.76   | 6.41   | 6.56   | 5.70 | 5.19 | 5.10 | -1.08              | -1.25         | 3.21E-03      | 1.12E-03      |
| Mtg2       | 5.61   | 5.06   | 5.69   | 4.92   | 5.69   | 5.68   | 4.10 | 4.65 | 4.41 | -1.04              | -1.04         | 2.86E-02      | 2.90E-02      |
| 6330416G13 | 5.43   | 5.26   | 5.84   | 5.99   | 6.48   | 6.46   | 4.09 | 4.39 | 4.92 | -1.03              | -1.85         | 2.48E-02      | 4.67E-04      |

<sup>1</sup> Table S2: Genes under-expressed in dKO vs. genetic (CtrlG) or animal (CtrlA) Tregs, as defined in Fig. 6A. Normalized expression (Log2 values) is given for each gene in each of the three independent replicates for each genotype. Log2 values of Fold change (FC) and p-values are given for indicated comparisons.
